# Supplementary material for: One-step synthesis of 5,6-diaryl pyridine-2(1H)-thiones from isoflavones
Source: Royal Society of Chemistry journal article supplement (doi:10.1039/c3ob27247h), 2013-01-01

# One-step synthesis of 5,6-diaryl pyridine-2(1*H*)-thiones from isoflavones.

Juanjuan Wang, Zunting Zhang\*, Wenli Wang, Fangfang Liu

*Key Laboratory of the Ministry of Education for Medicinal Resources and Natural Pharmaceutical Chemistry, National Engineering Laboratory for Resource Development of Endangered Crude Drugs in Northwest of China, and School of Chemistry and Chemical Engineering, Shaanxi Normal University, Xi'an 710062, P.R. China*

e-mail: zhangzt@snnu.edu.cn

## Supporting Information

### Table of Content

|                                                                                                             |          |
|-------------------------------------------------------------------------------------------------------------|----------|
| <b>General Information</b> .....                                                                            | <b>2</b> |
| <b>General Procedure for the Synthesis of 3-Cyano-5,6-diaryl Pyridine-2(1<i>H</i>)-thiones (3a-u)</b> ..... | <b>2</b> |
| <b>Crystal and structure refinement data for 3a (crystallized from acetone)</b> .....                       | <b>3</b> |
| <b><sup>1</sup>H and <sup>13</sup>C NMR spectra</b> .....                                                   | <b>5</b> |

## General Information:

$^1\text{H}$  NMR (300 MHz) and  $^{13}\text{C}$  NMR (75 MHz) spectra were recorded in  $\text{DMSO-}d_6$  solution, using tetramethylsilane (TMS) as an internal standard unless otherwise noted. HRMS spectra were recorded using ESI technique and IR spectra were recorded in KBr pellet. Melting points were measured on micro melting point apparatus and are uncorrected. TLC was performed on Merck kieselgel 60-F<sub>254</sub> and products were detected with 254 nm light. Merck kieselgel 60 (230-400 mesh) was used for column chromatography.

## General Procedure for the Synthesis of 3-Cyano-5,6 Pyridine-2(1H)-thiones

### (3a-u):

The corresponding isoflavones **1a-u** (1 mmol), cyanothioacetamide **2** (200 mg, 2 mmol), and solid NaOH (140 mg, 3.5 mmol) were reacted in DMF at 90 °C (10 mL) for 5-7 h. The progress of the reactions was monitored by TLC till the disappearance of **1a-u**. The reaction mixture was poured into water (40 mL) and acidified with 2% HCl/H<sub>2</sub>O to the neutral pH. The precipitated yellow solid was filtered off and was purified on silica gel column ( $\text{CHCl}_3/\text{MeOH}$ , 100:1) to give the corresponding products **3a-u** as colorless amorphous powders.

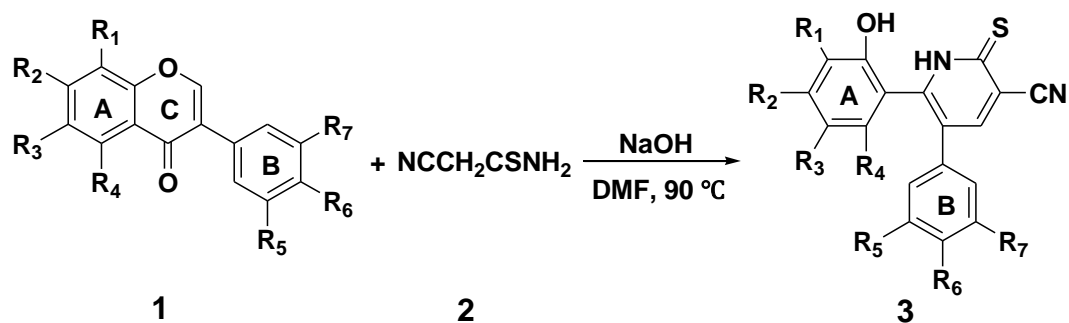

## Crystal and structure refinement data for 3a dimer(crystallized from acetone)

X-Ray Crystallography. The crystallographic data of compound 3a dimer is collected in Table 1. Details of the structure investigations are available on request from the Cambridge Crystallographic Data Centre, on quoting the depository numbers.

### X-ray crystal structure of 3a dimer(crystallized from acetone)

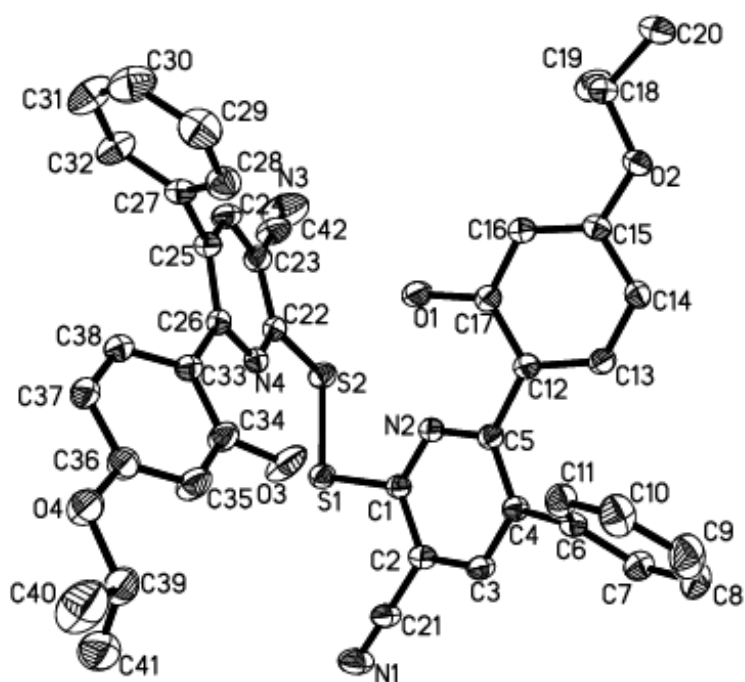

**Table 1** The crystallographic data of compound **3a** dimer

| <b>Compound 3a dimer</b>             | <b>Data</b>                                                                              |
|--------------------------------------|------------------------------------------------------------------------------------------|
| Empirical formula                    | C <sub>21</sub> H <sub>17</sub> N <sub>2</sub> O <sub>2</sub> S                          |
| Formula weight                       | 361.43                                                                                   |
| Temperature                          | 296(2) K                                                                                 |
| Wavelength                           | 0.71073 Å                                                                                |
| Crystal system, space group          | Triclinic, P-1                                                                           |
| Unit cell dimensions                 | $a = 11.5891(16)$ Å, $b = 13.0949(18)$ Å<br>$c = 14.337(3)$ Å, $\beta = 98.964(3)^\circ$ |
| Volume                               | 1860.8(6) Å <sup>3</sup>                                                                 |
| Z, Density (calculated)              | 4, 1.290 Mg/m <sup>3</sup>                                                               |
| Absorption coefficient               | 0.191 mm <sup>-1</sup>                                                                   |
| F(000)                               | 892                                                                                      |
| Crystal size                         | 0.38 × 0.30 × 0.27 mm                                                                    |
| $\theta$ range for data collection   | 1.52-25.10°                                                                              |
| Limiting indices                     | $-12 \leq h \leq 13$ , $-15 \leq k \leq 15$ , $-17 \leq l \leq 12$                       |
| Reflections collected / unique       | 9425 / 6555 [R(int) = 0.0230]                                                            |
| Completeness to $\theta = 25.10$     | 99.0 %                                                                                   |
| Absorption correction                | None                                                                                     |
| Max. and min. transmission           | 0.9511 and 0.9311                                                                        |
| Refinement method                    | Full-matrix least-squares on $F^2$                                                       |
| Data / restraints / parameters       | 6555 / 0 / 475                                                                           |
| Goodness-of-fit on $F^2$             | 1.029                                                                                    |
| Final R indices [ $I > 2\sigma(I)$ ] | $R1 = 0.0503$ , $\omega R2 = 0.1388$                                                     |
| R indices (all data)                 | $R1 = 0.0741$ , $\omega R2 = 0.1698$                                                     |
| Extinction coefficient               | 0.005(3)                                                                                 |
| Largest diff. peak and hole          | 0.375 and -0.353 e.Å <sup>-3</sup>                                                       |

### **<sup>1</sup>H and <sup>13</sup>C NMR spectra:**

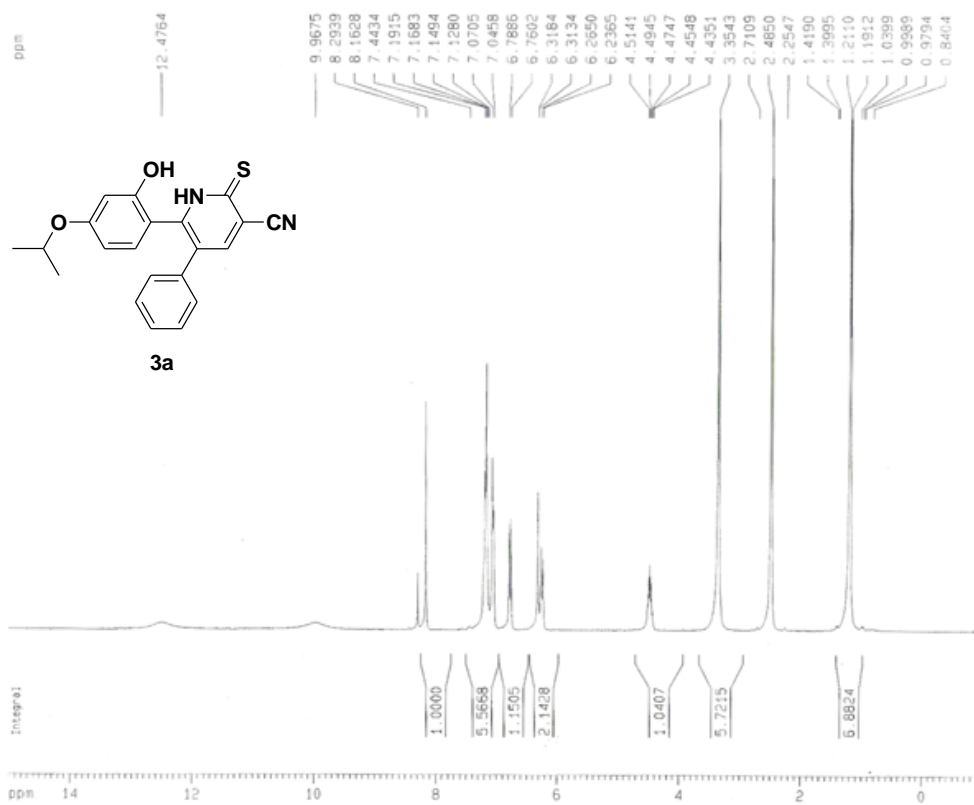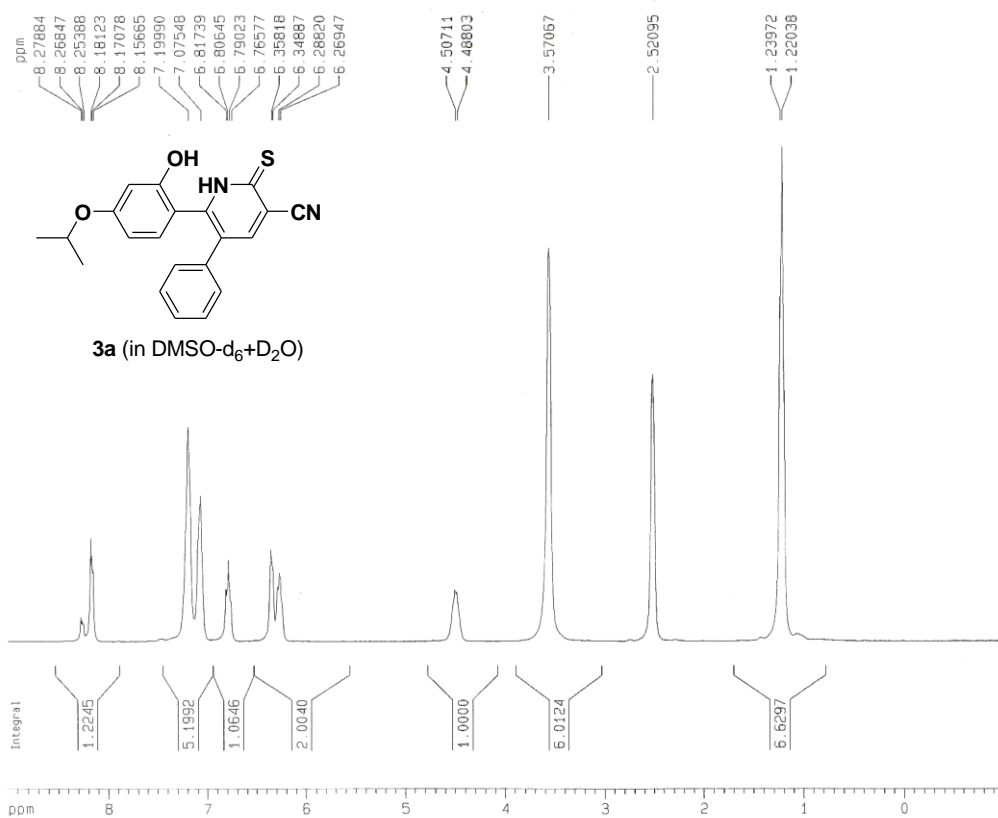

20110707\_001  
13C-NMR of

21j-201  
157.66  
156.09  
155.70

115.13  
107.85  
101.91  
101.81  
100.38  
101.88

117.17  
116.80  
106.66  
101.88  
102.81

69.17

21.88

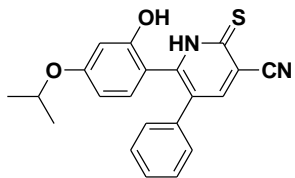

3a (in DMSO-d<sub>6</sub>+D<sub>2</sub>O)

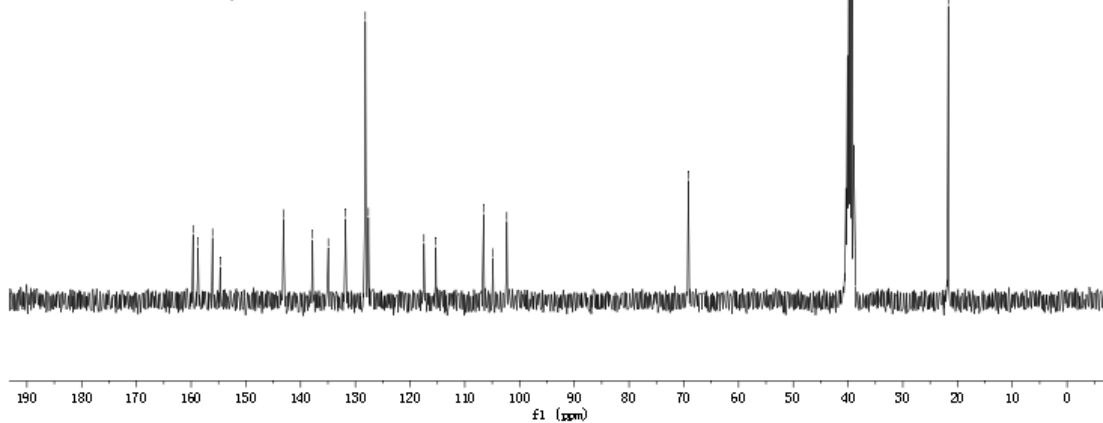

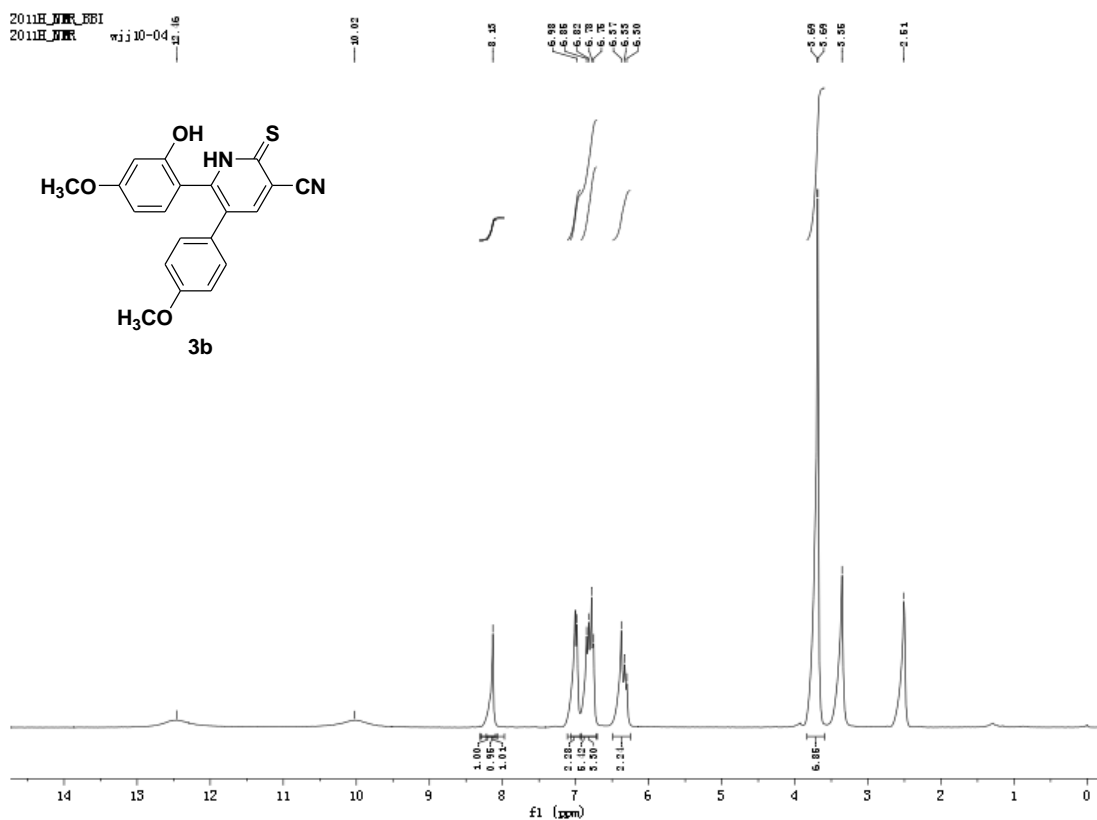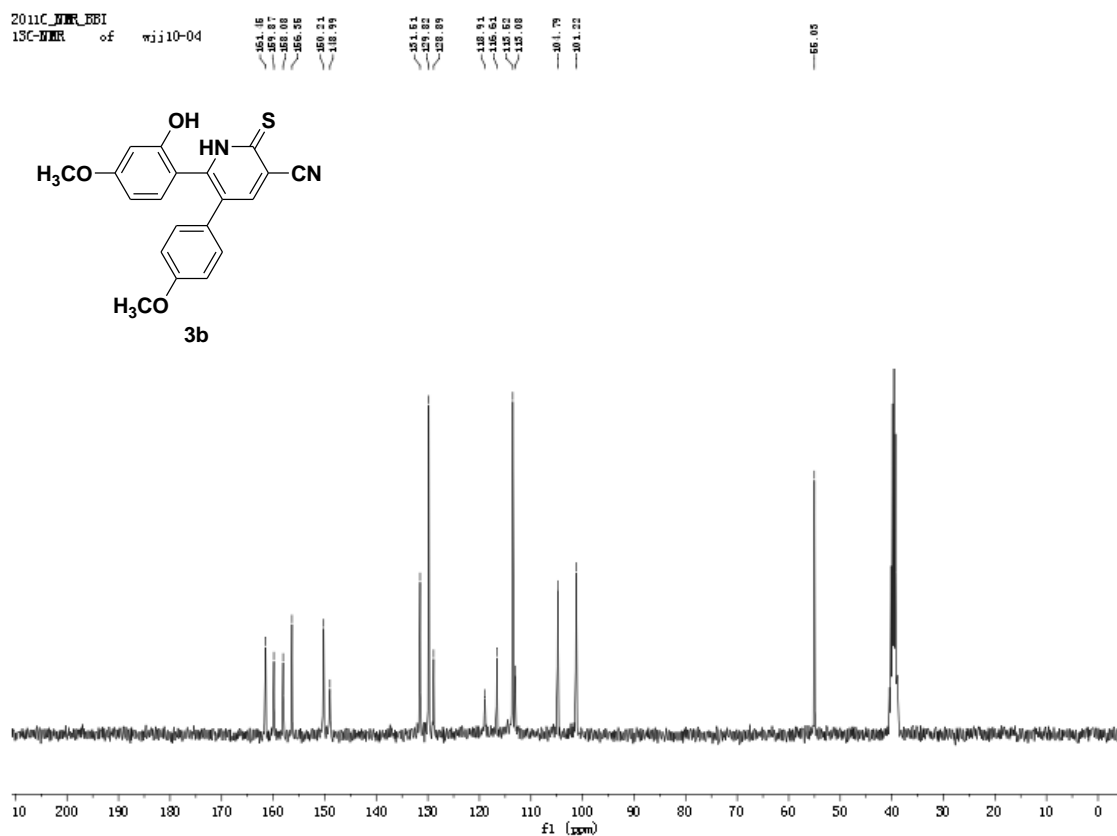

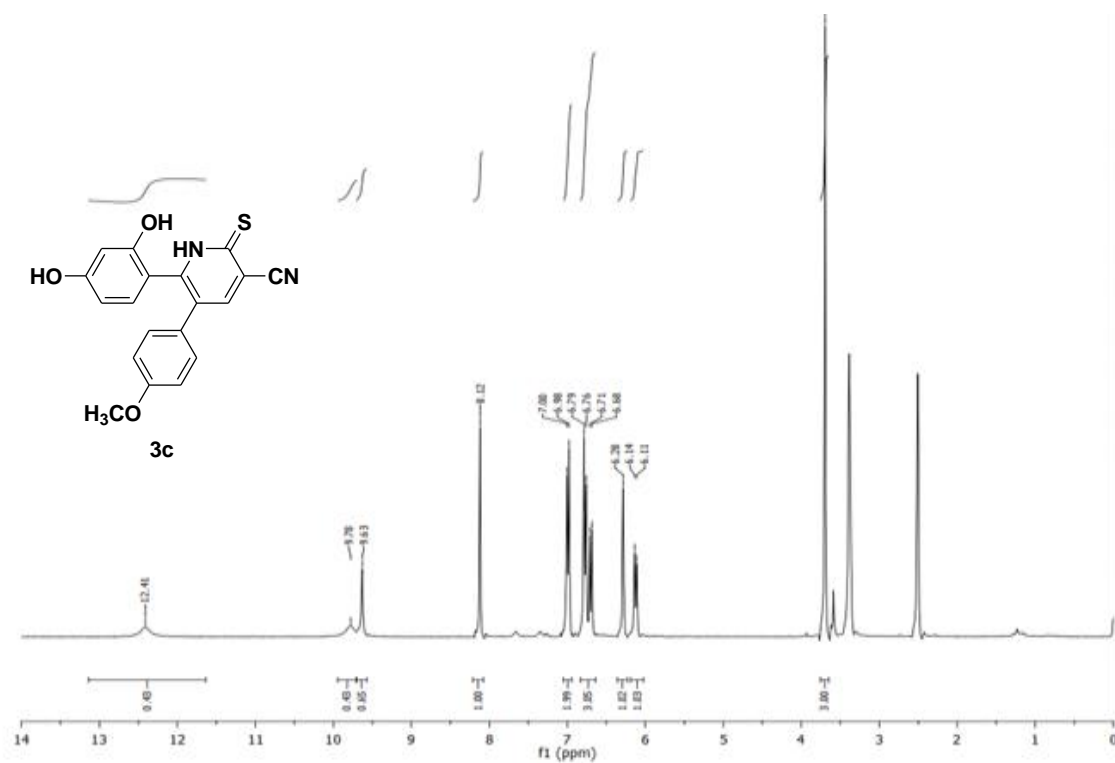

2011C\_NMR\_BBI  
13C-NMR of wjj10-05

161.57  
150.81  
147.61  
140.09  
139.86  
127.46  
124.62  
123.44  
122.71  
119.77  
115.91  
112.69  
101.51  
101.23  
55.01

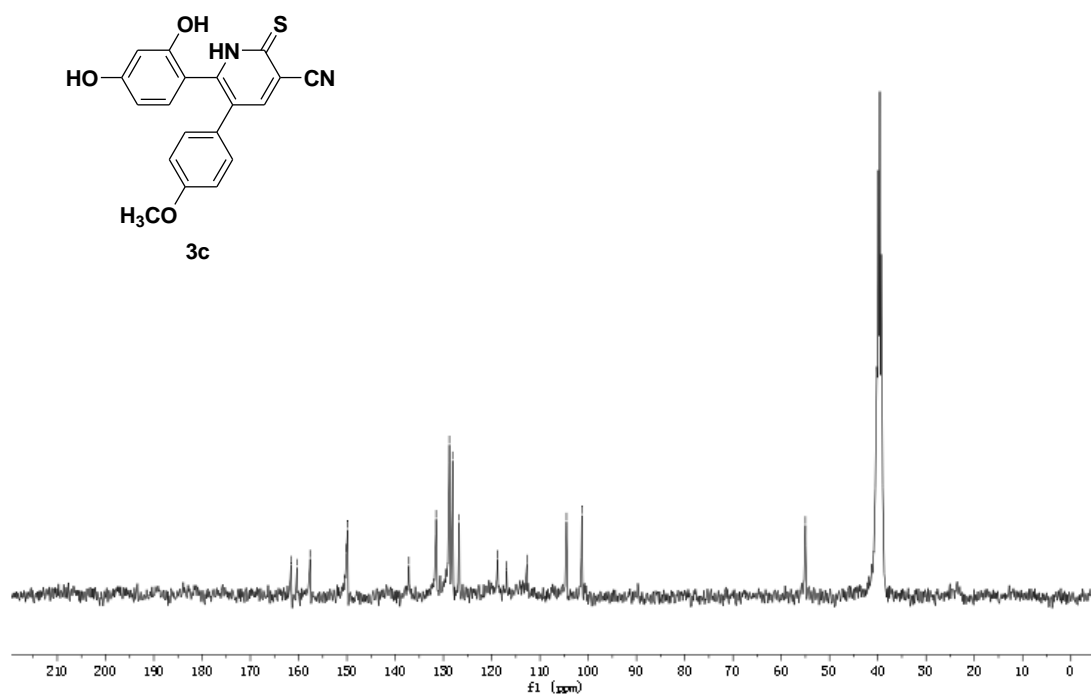



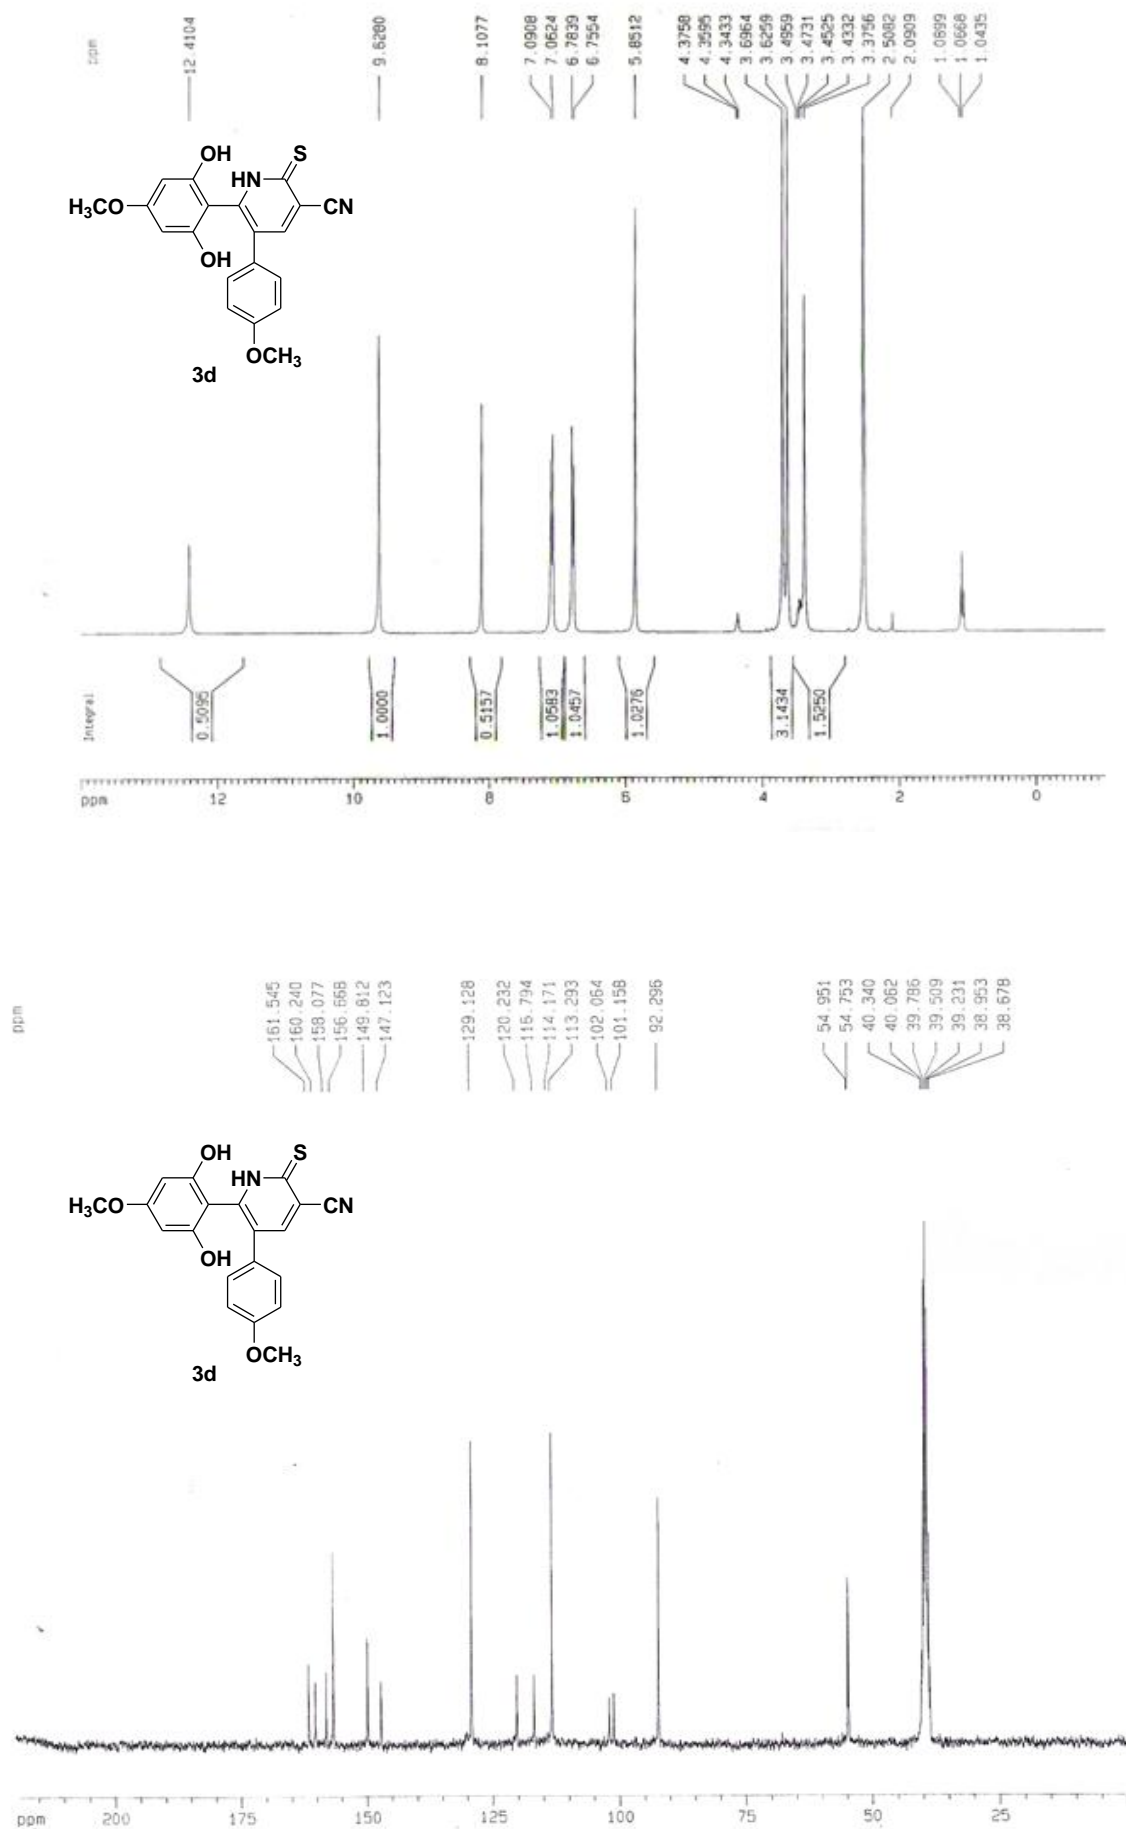

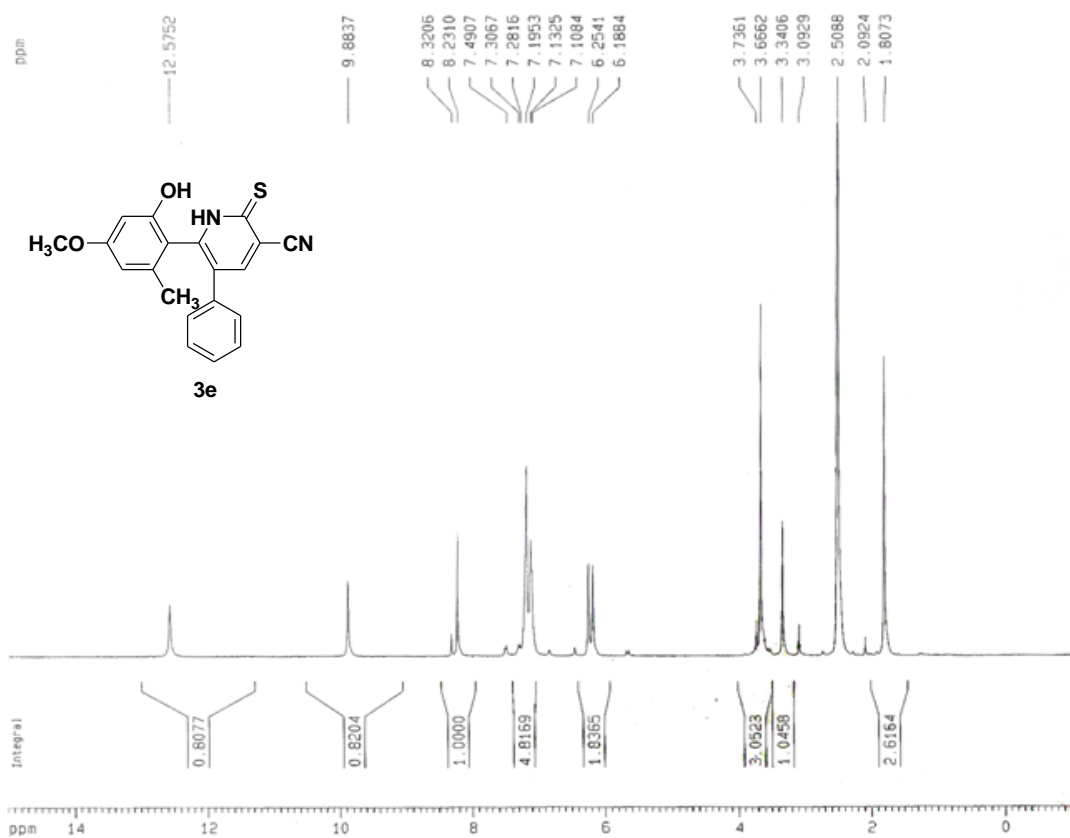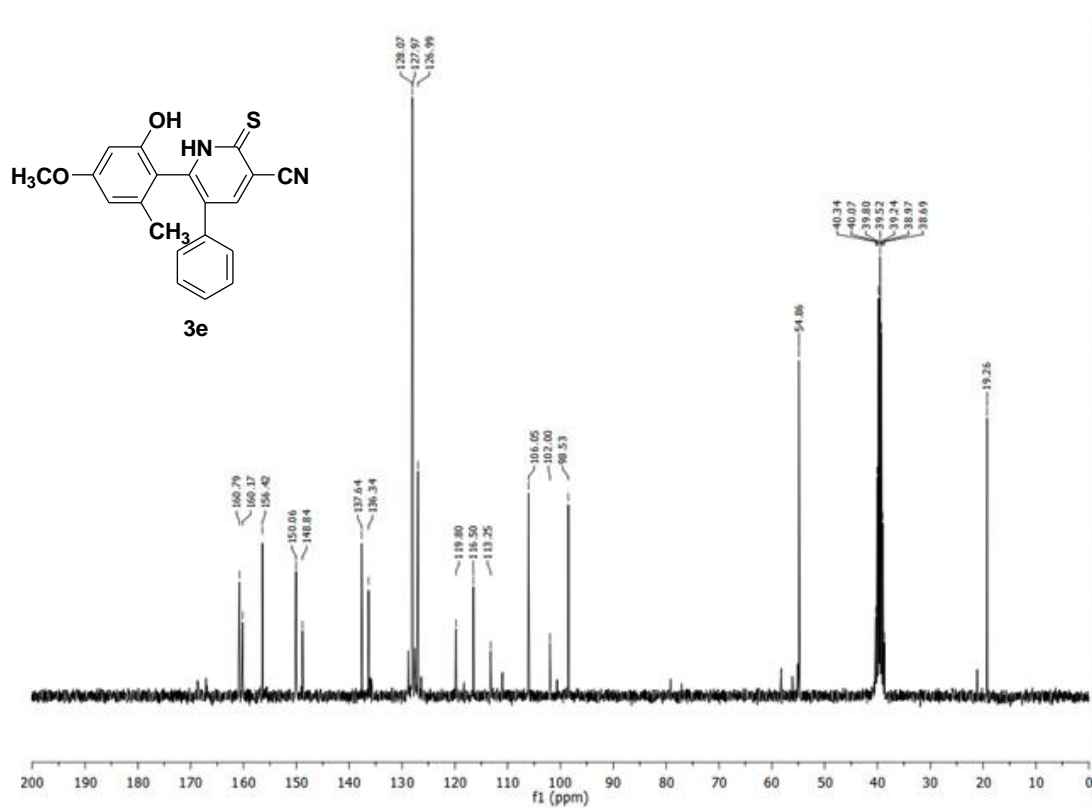

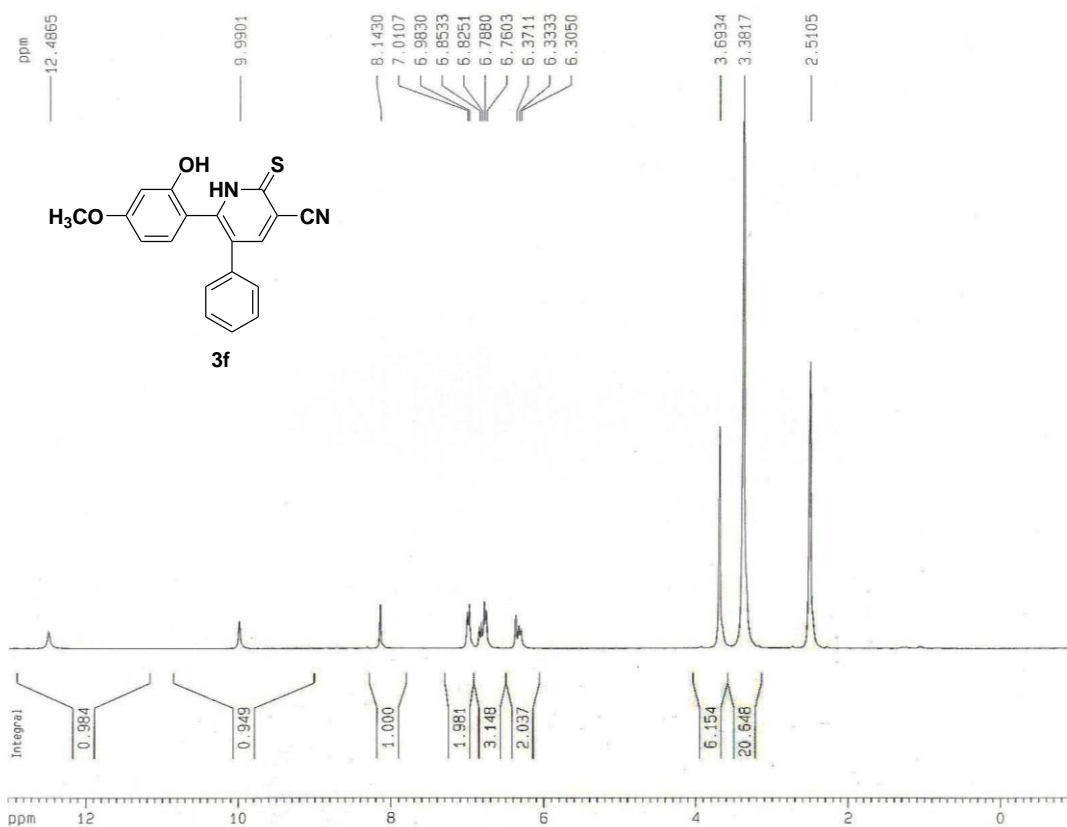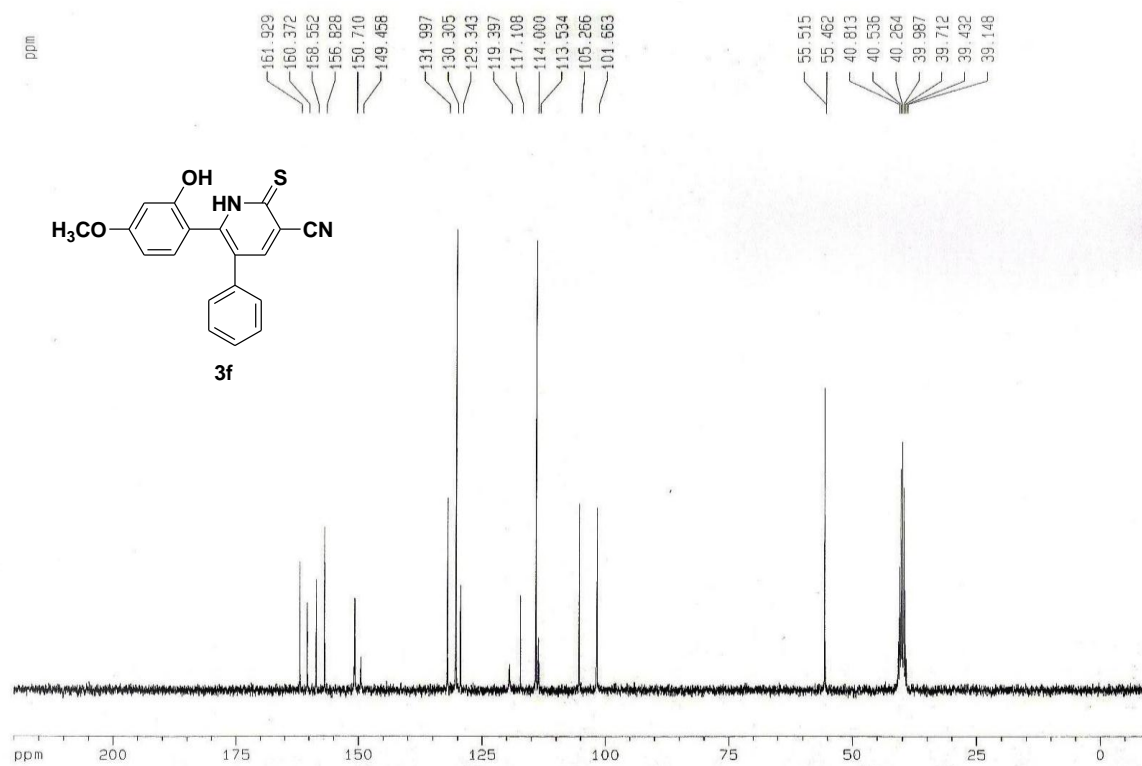

2011h\_NMR\_EBI  
2011h\_NMR wjj10-02

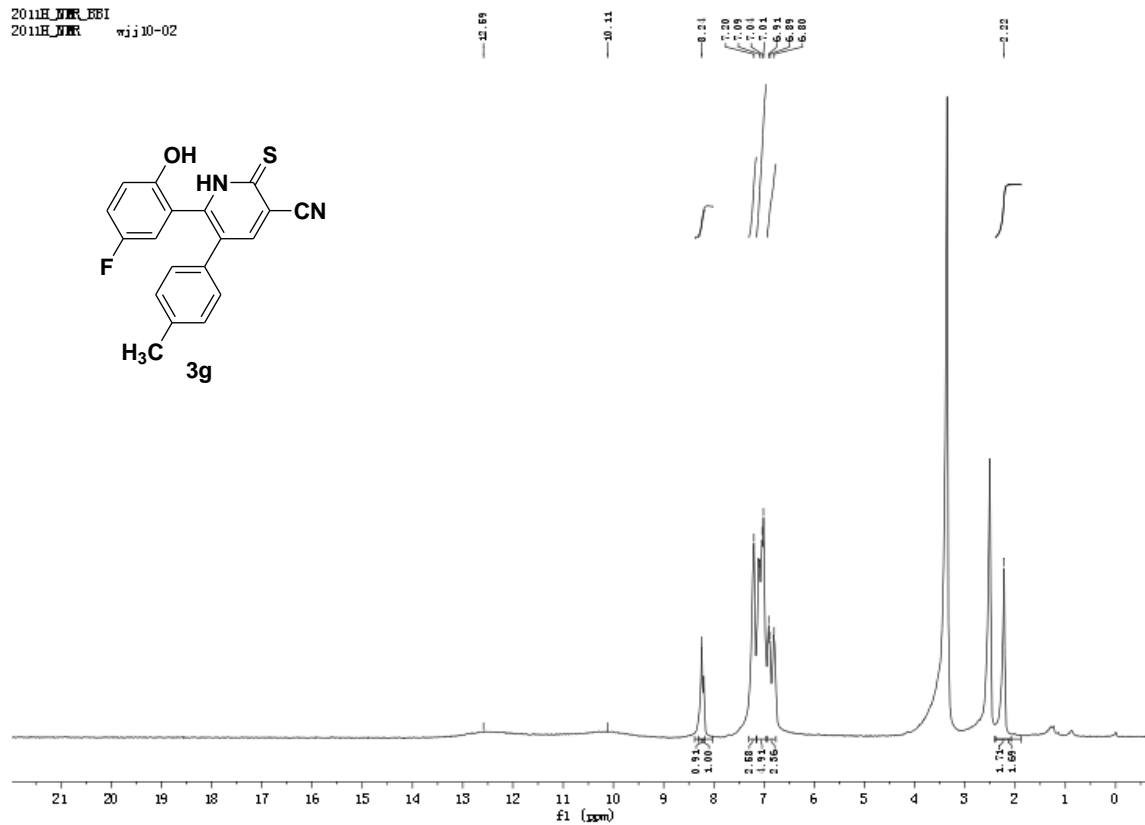

2011c\_NMR\_EBI  
13C-NMR of wjj10-02

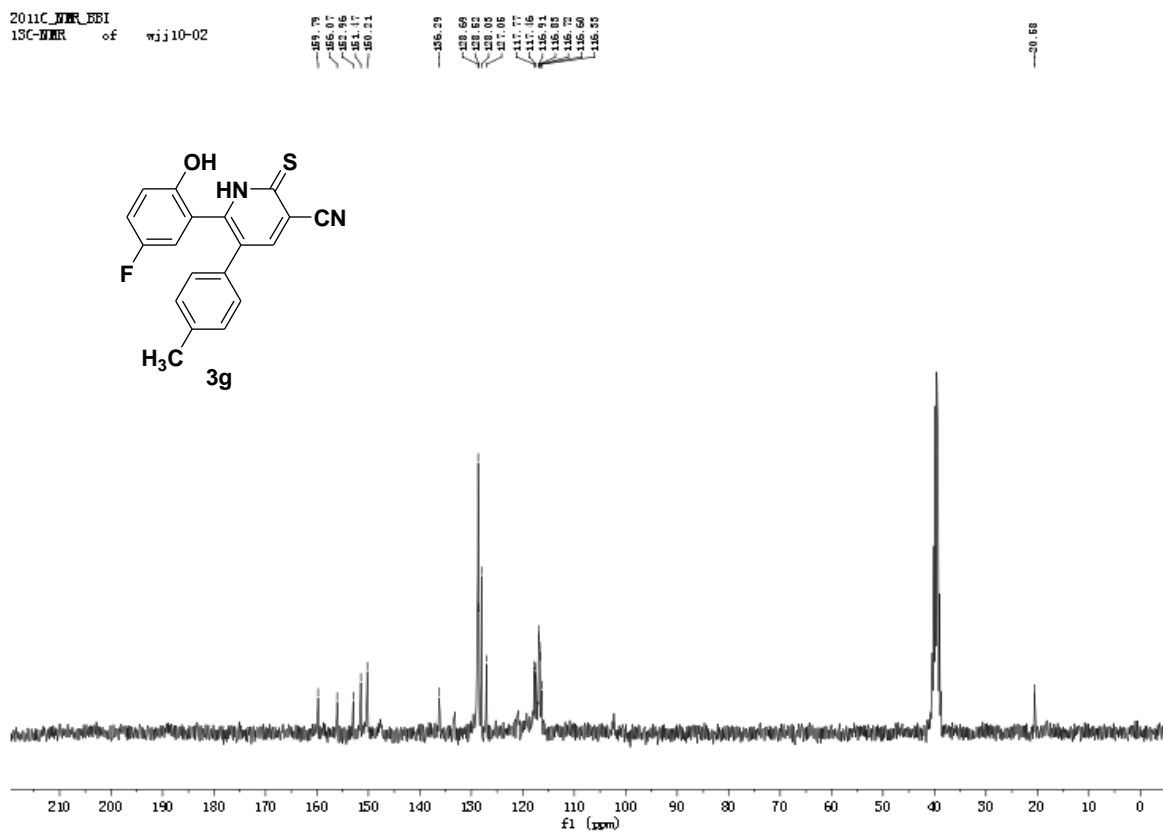

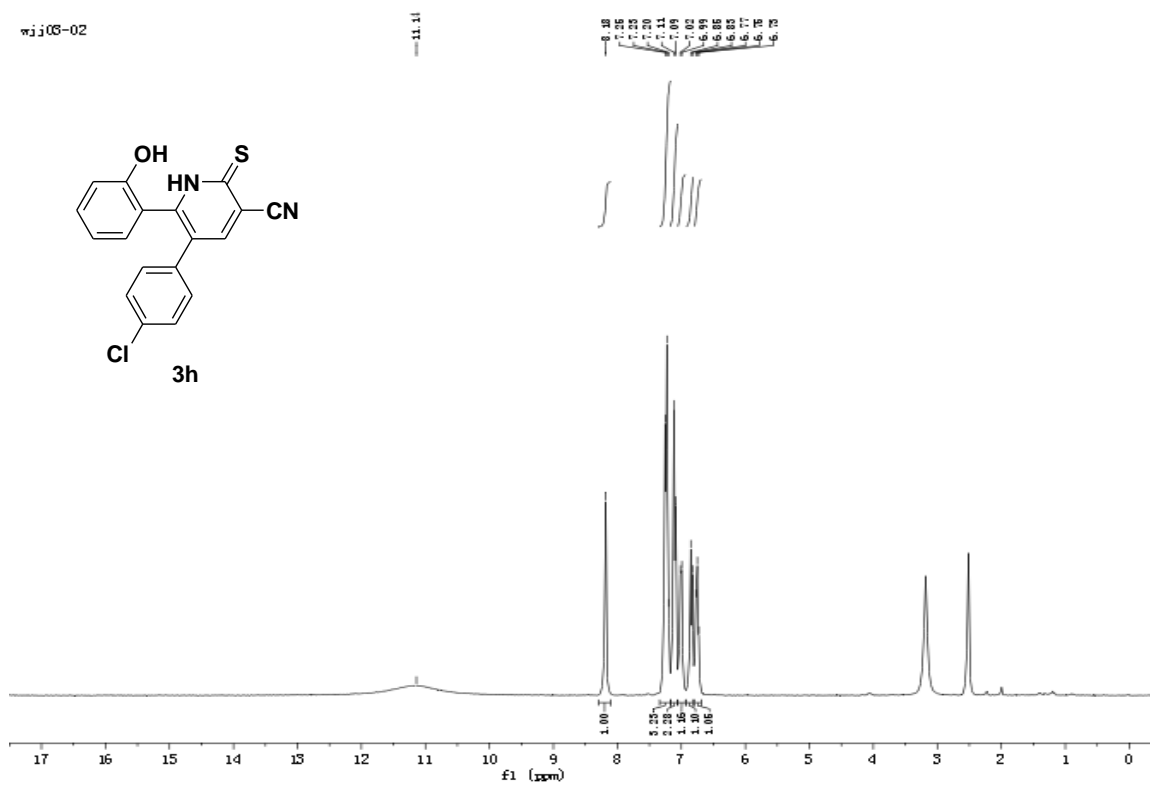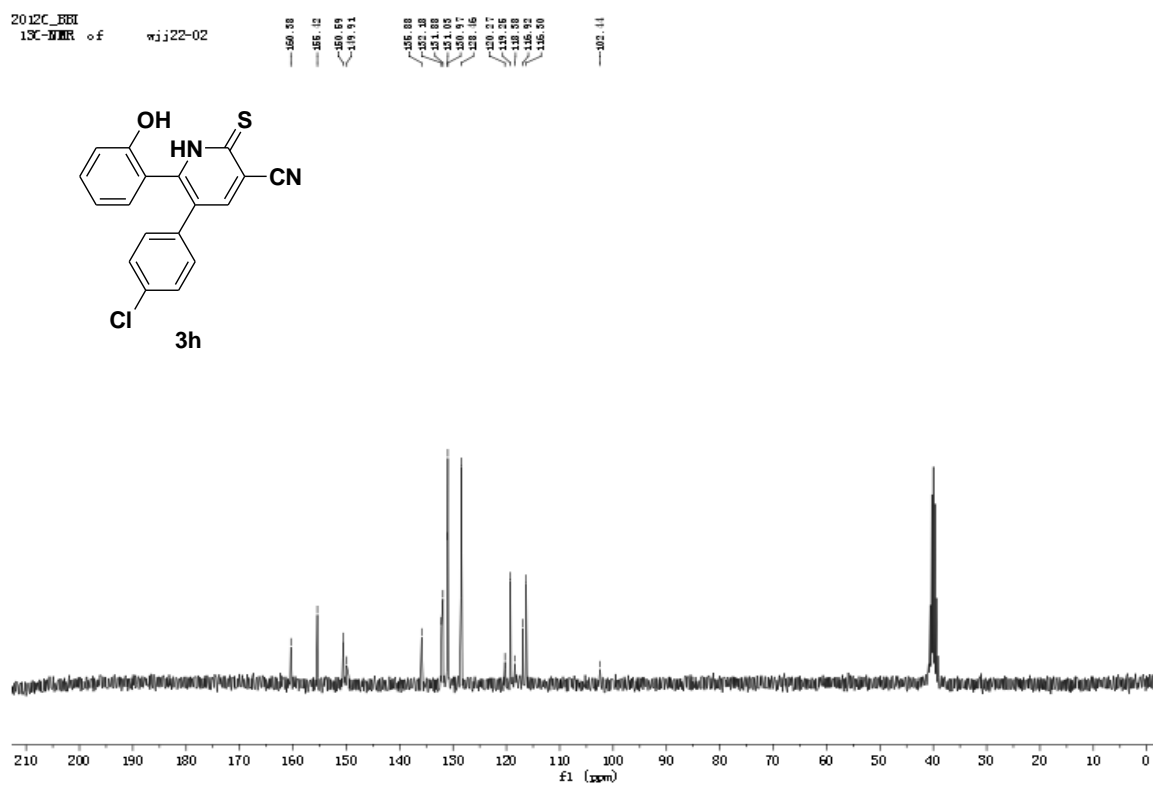

wjj06-03

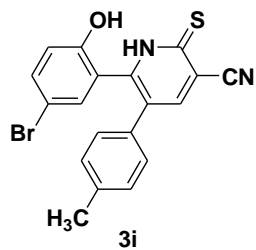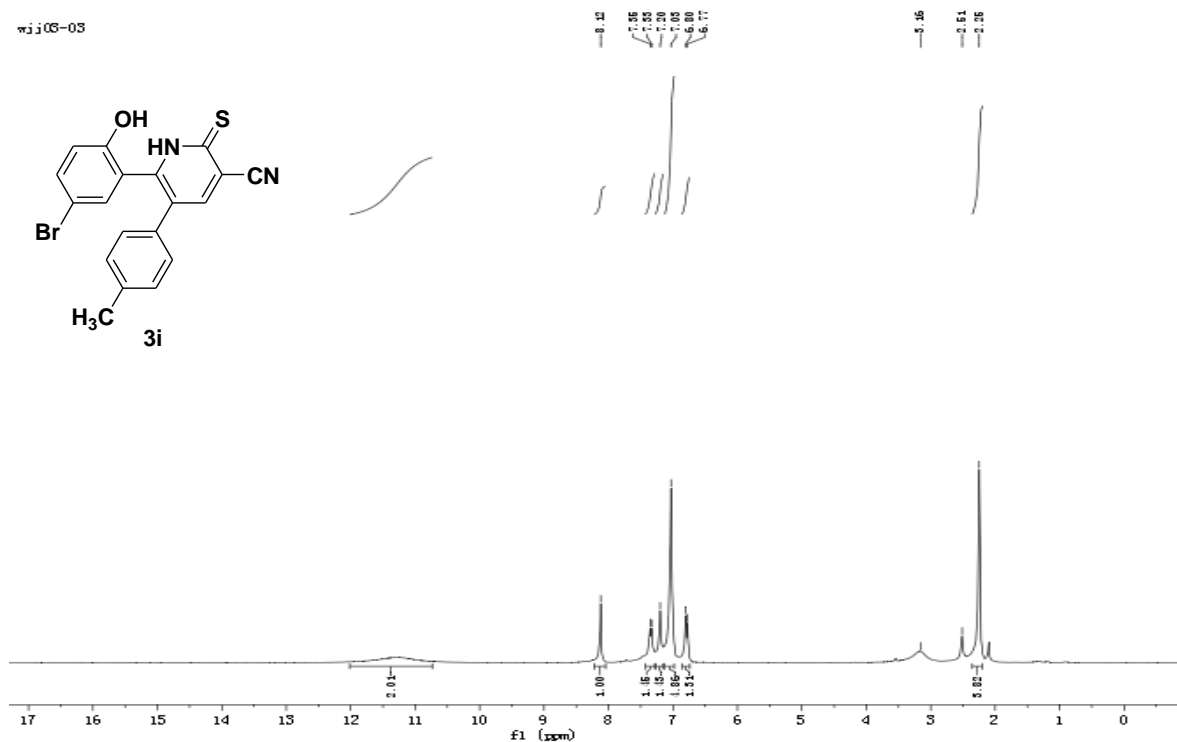

2012C\_BBI  
13C-NMR of wjj22-03

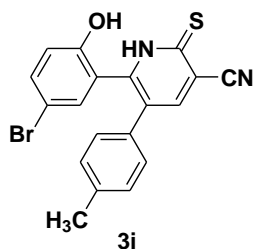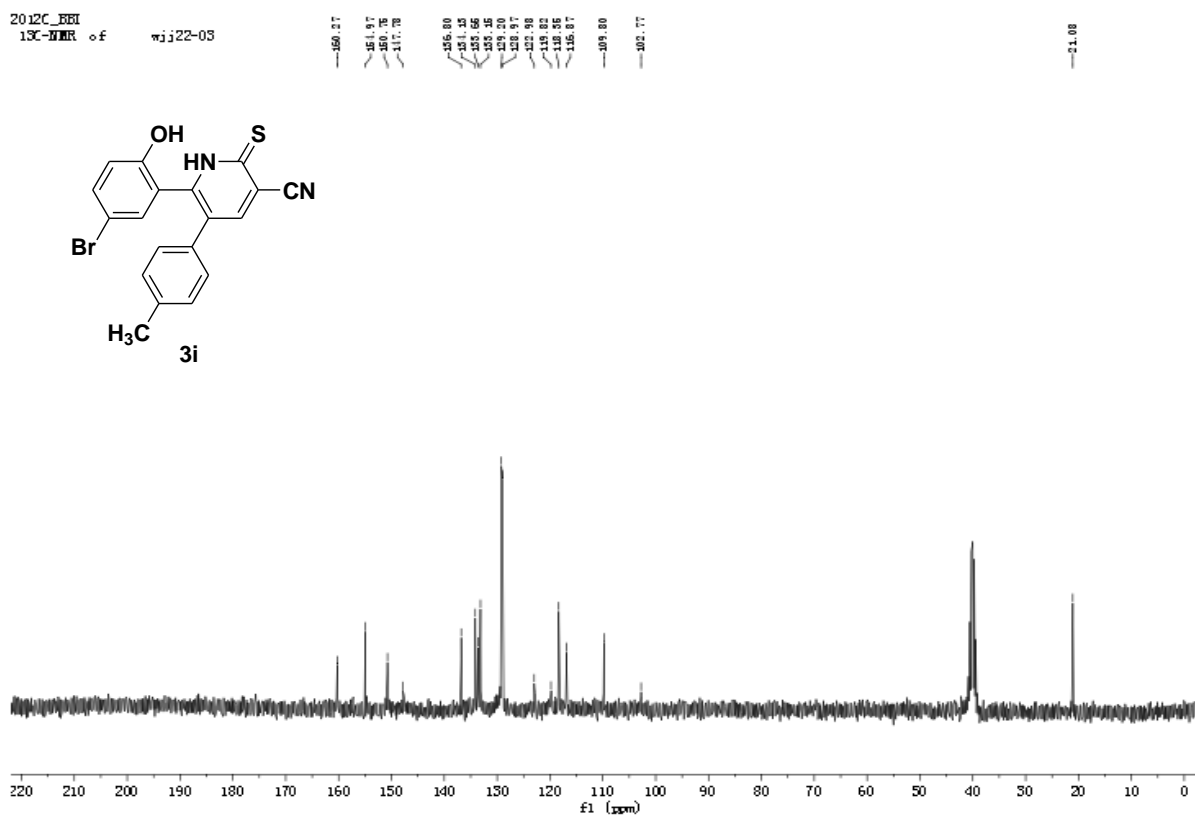

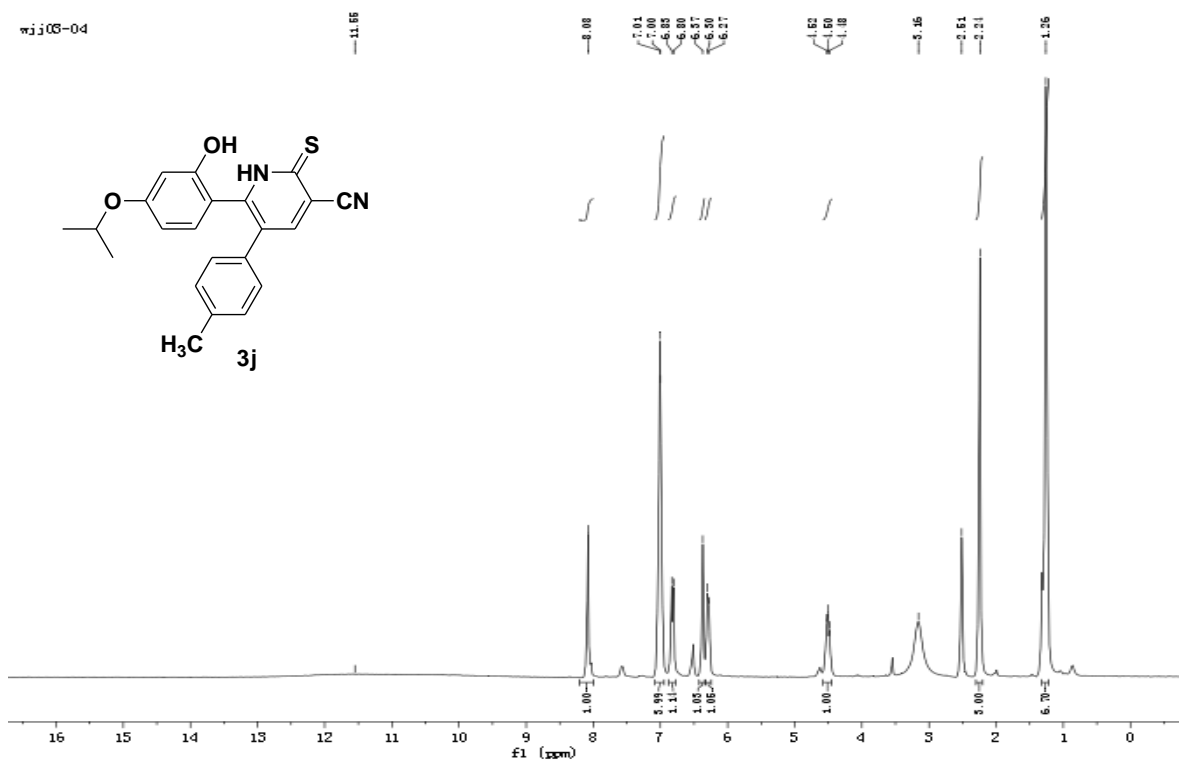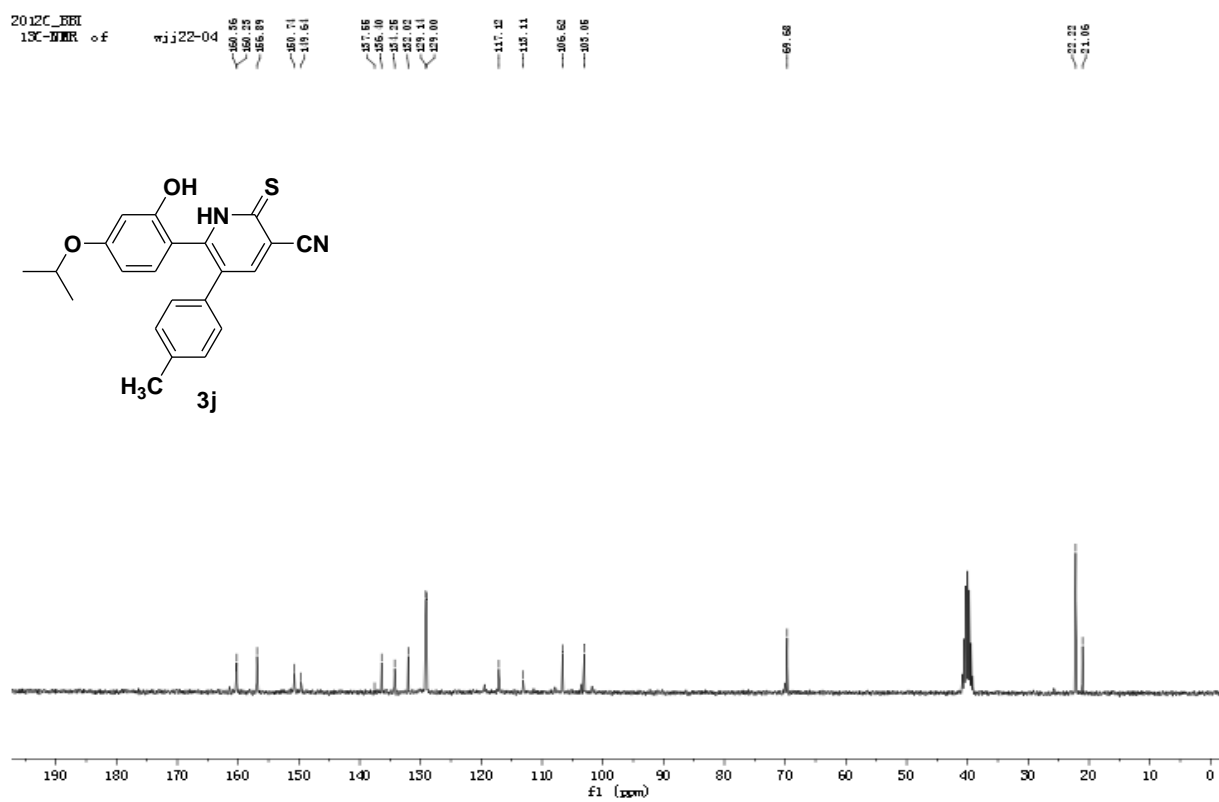

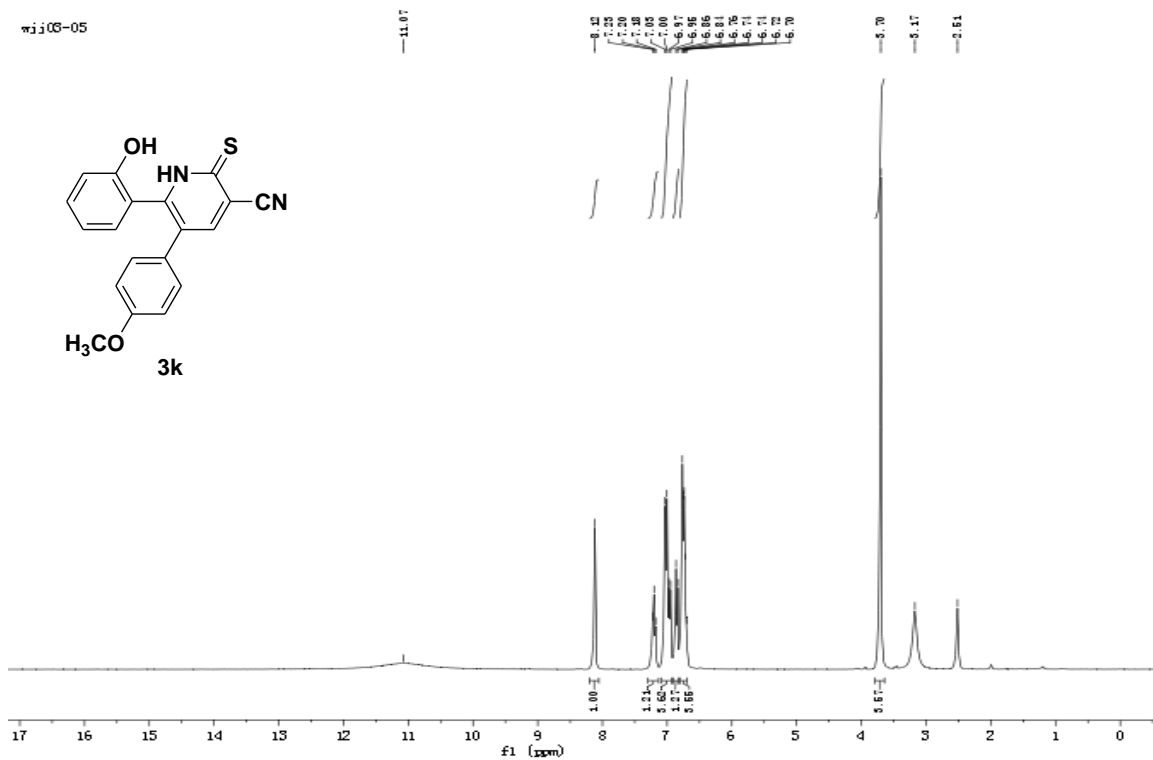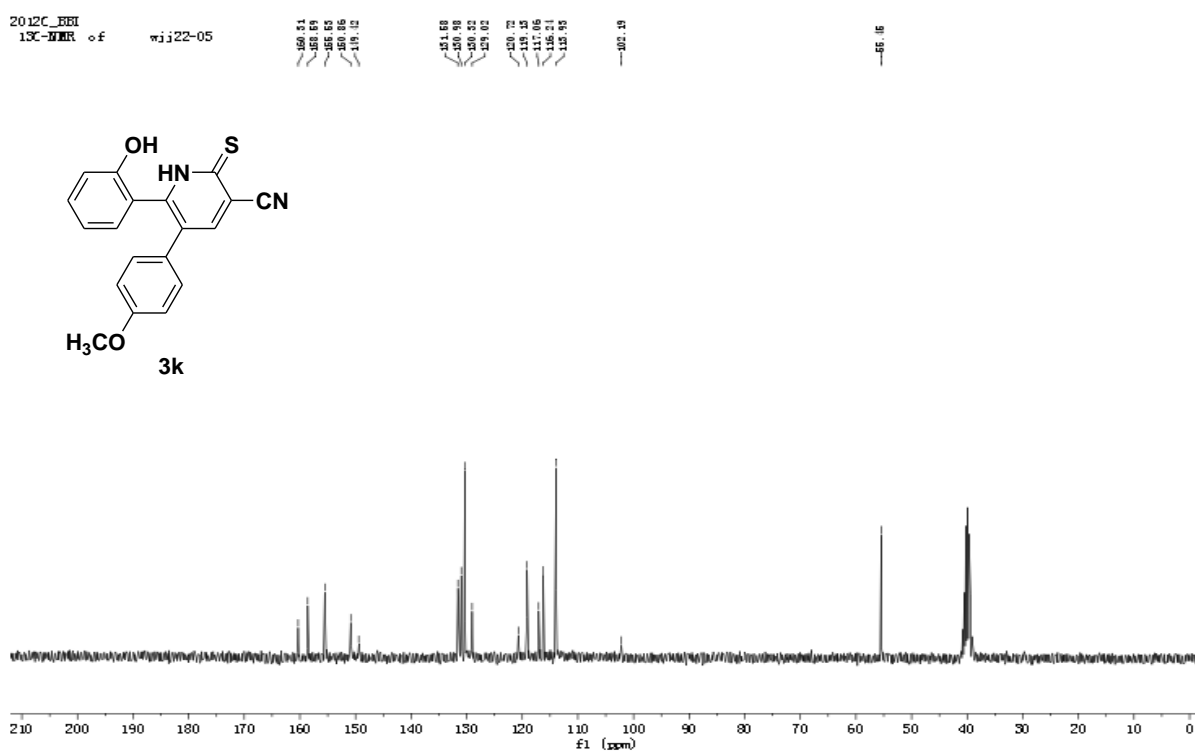



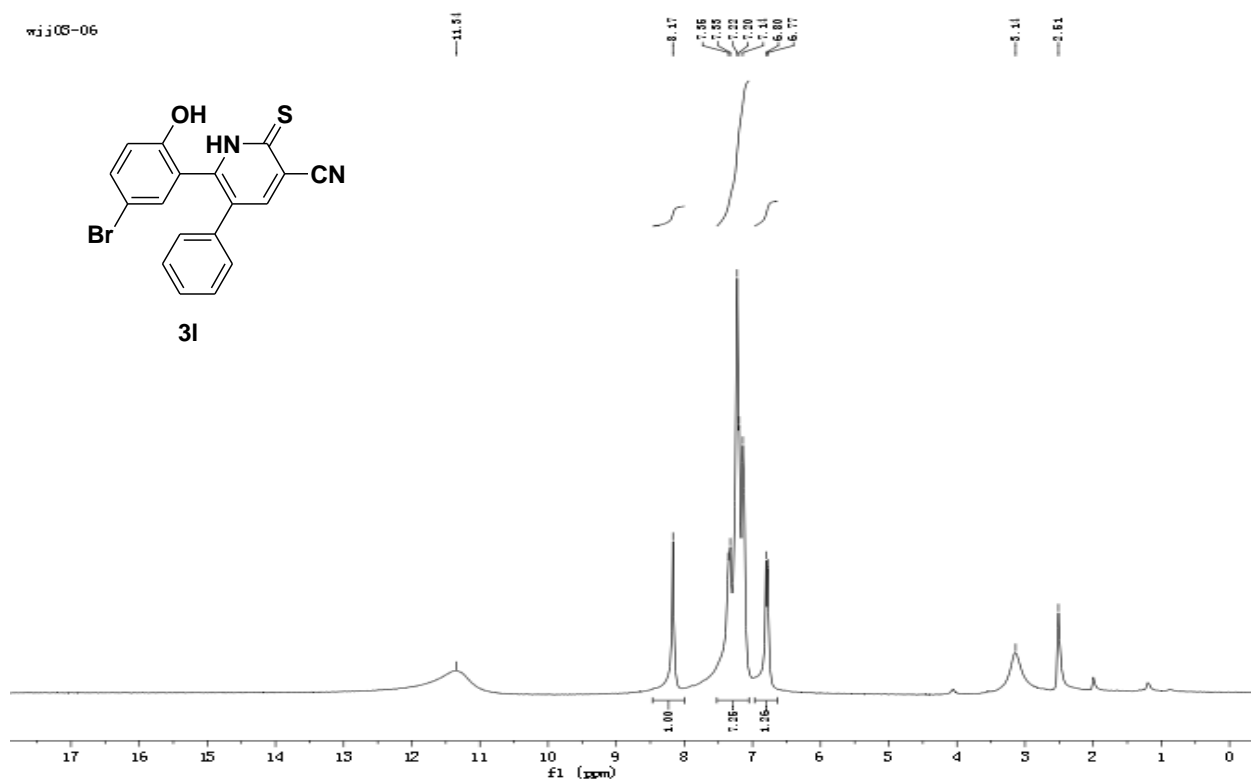

2012C\_BBI  
13C-NMR of wj122-06

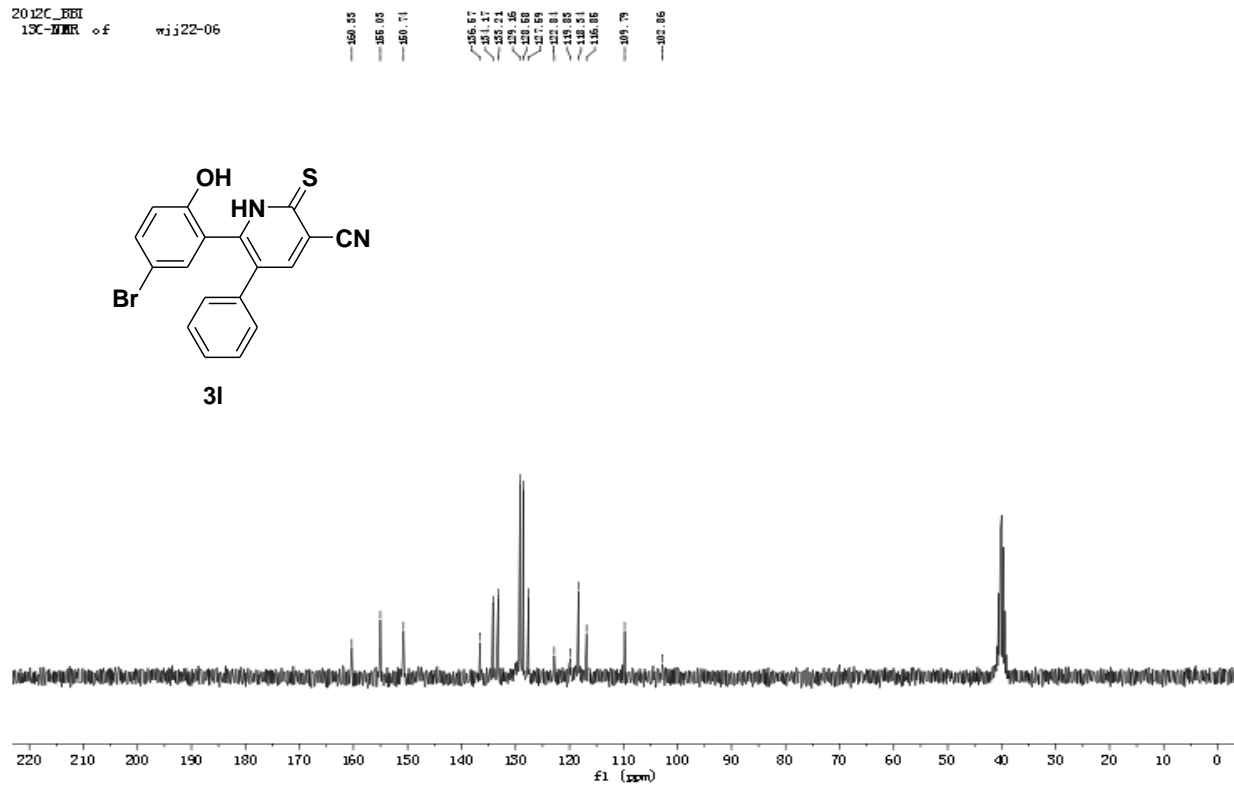

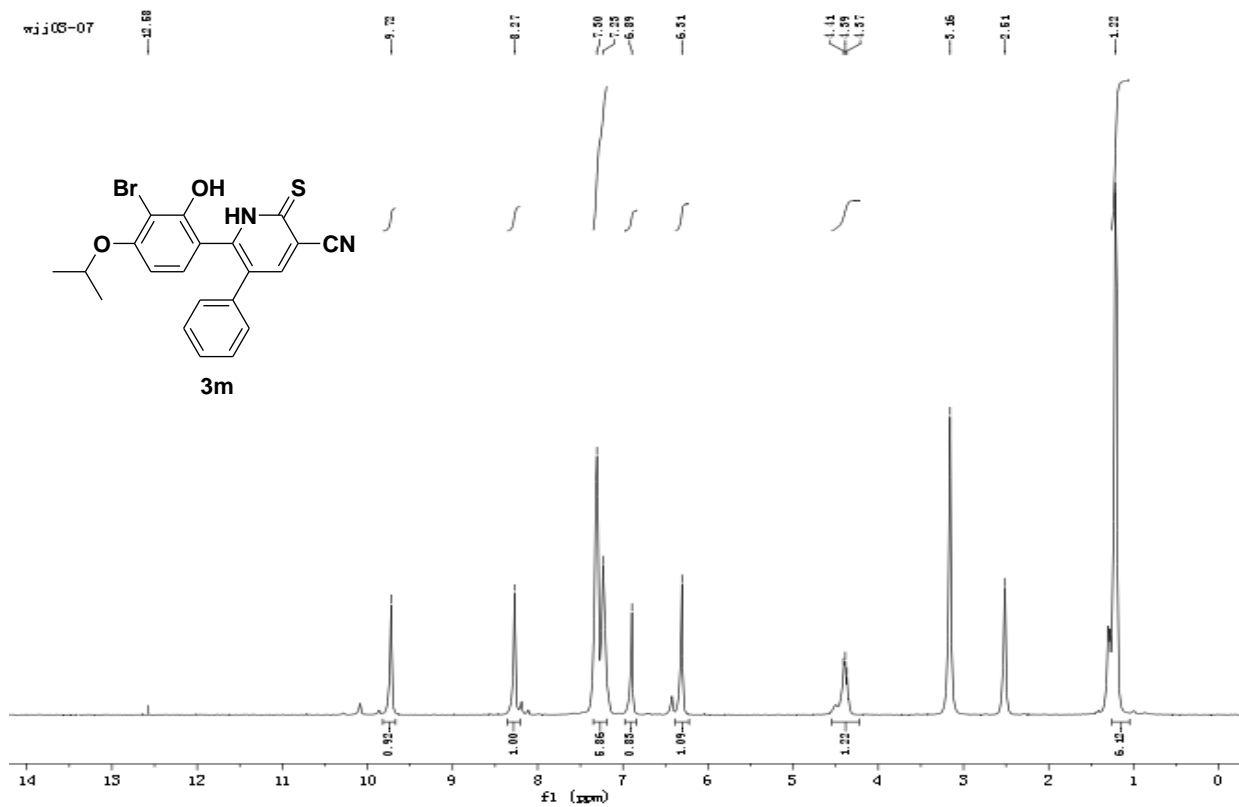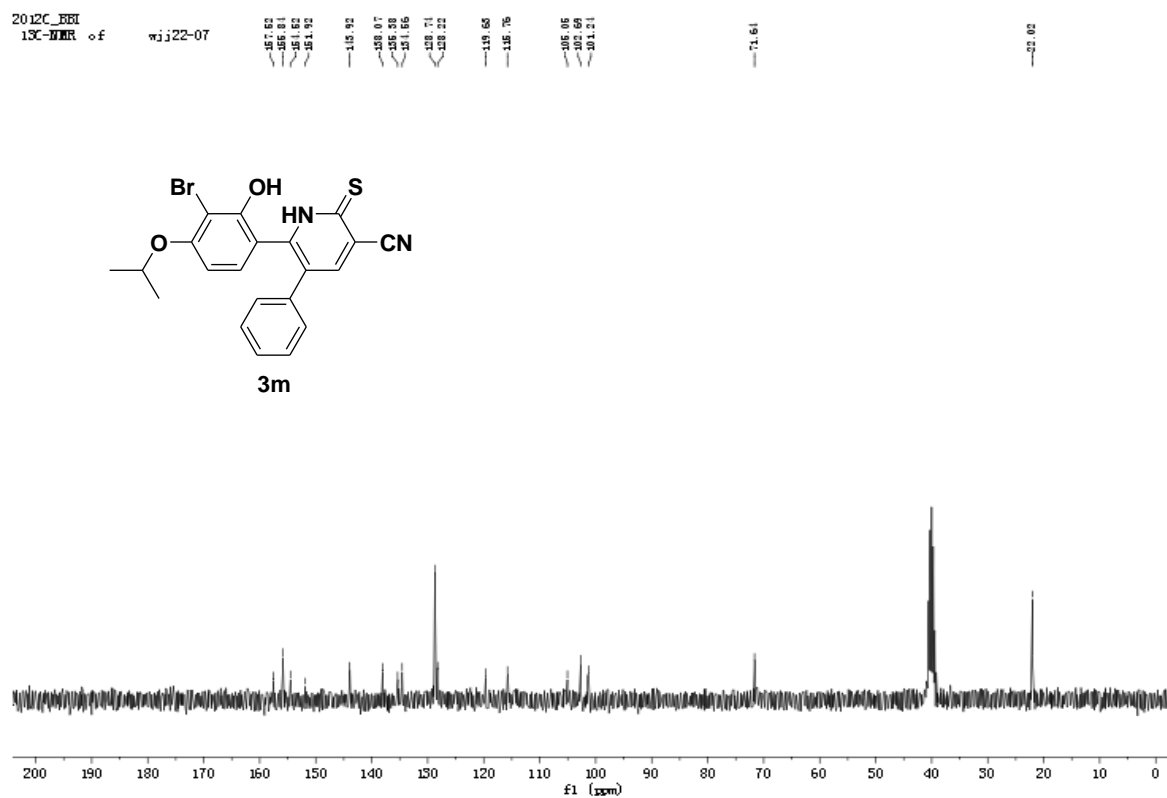

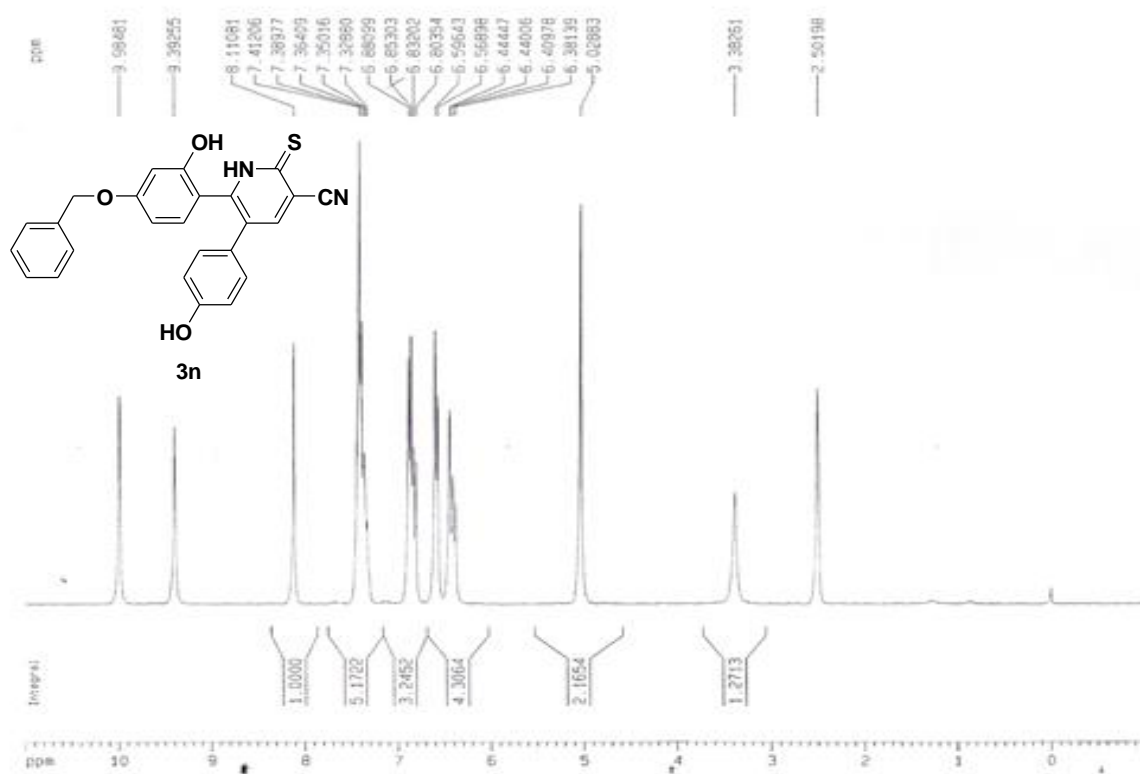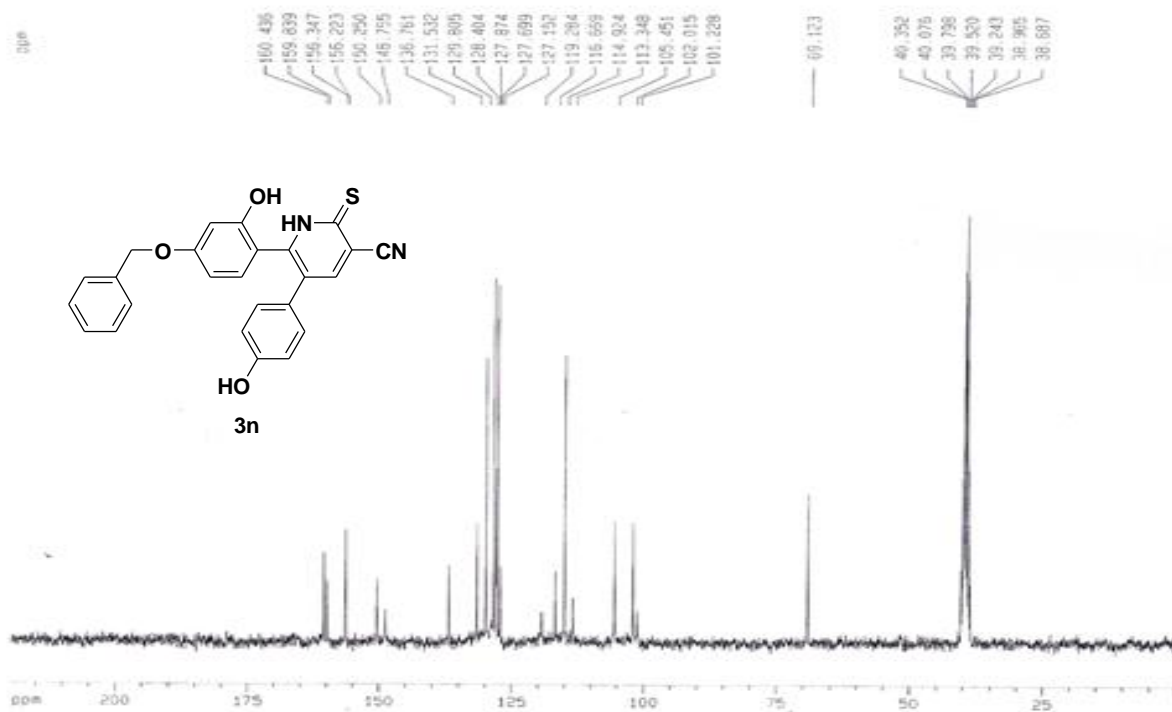

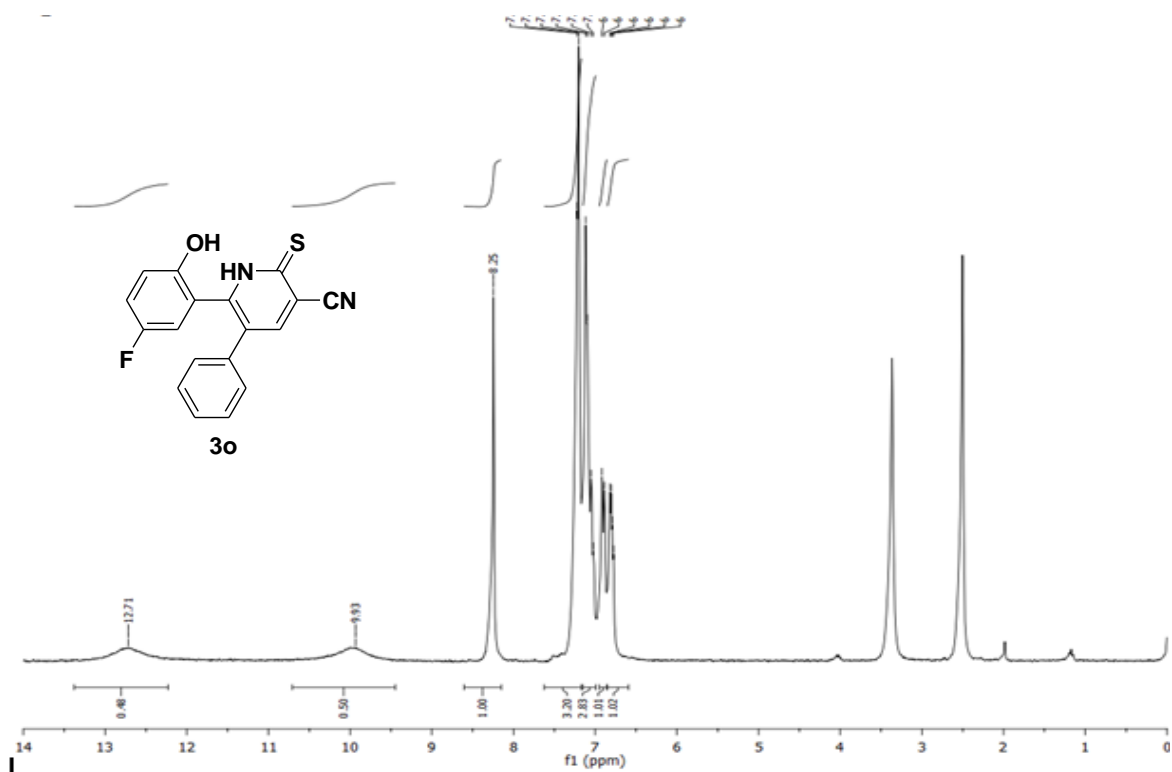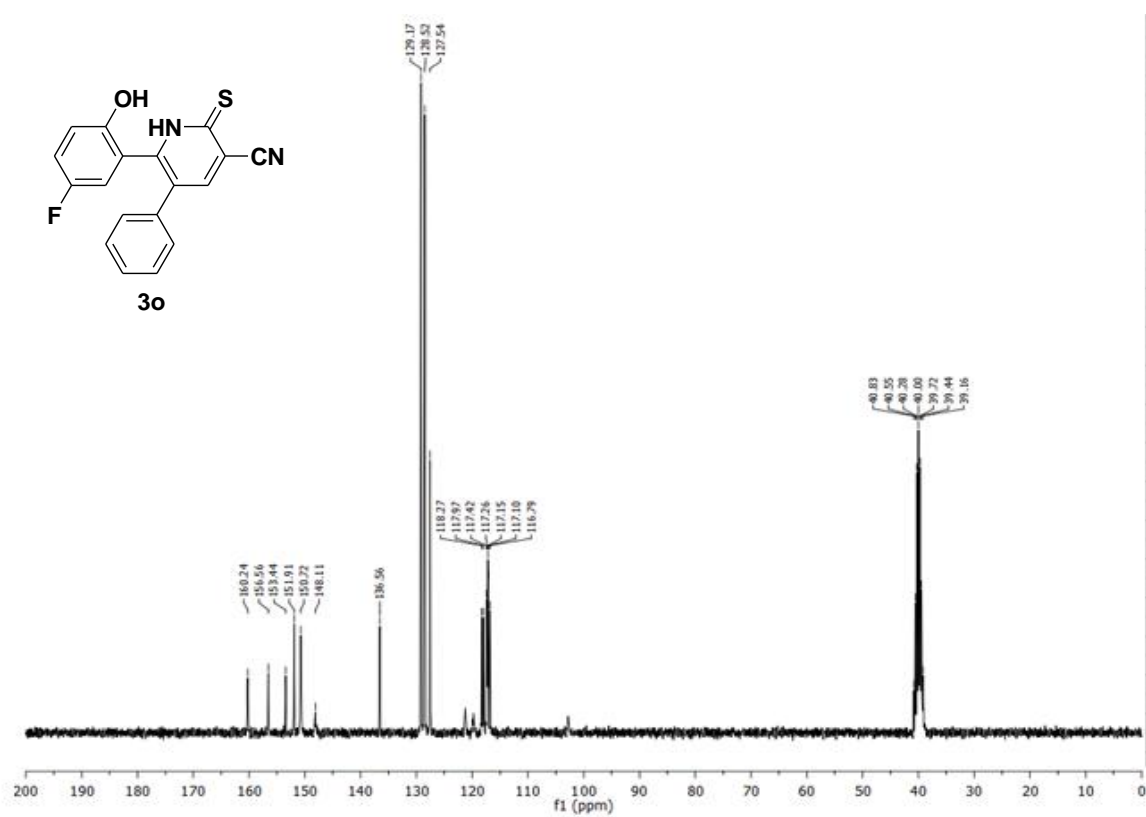

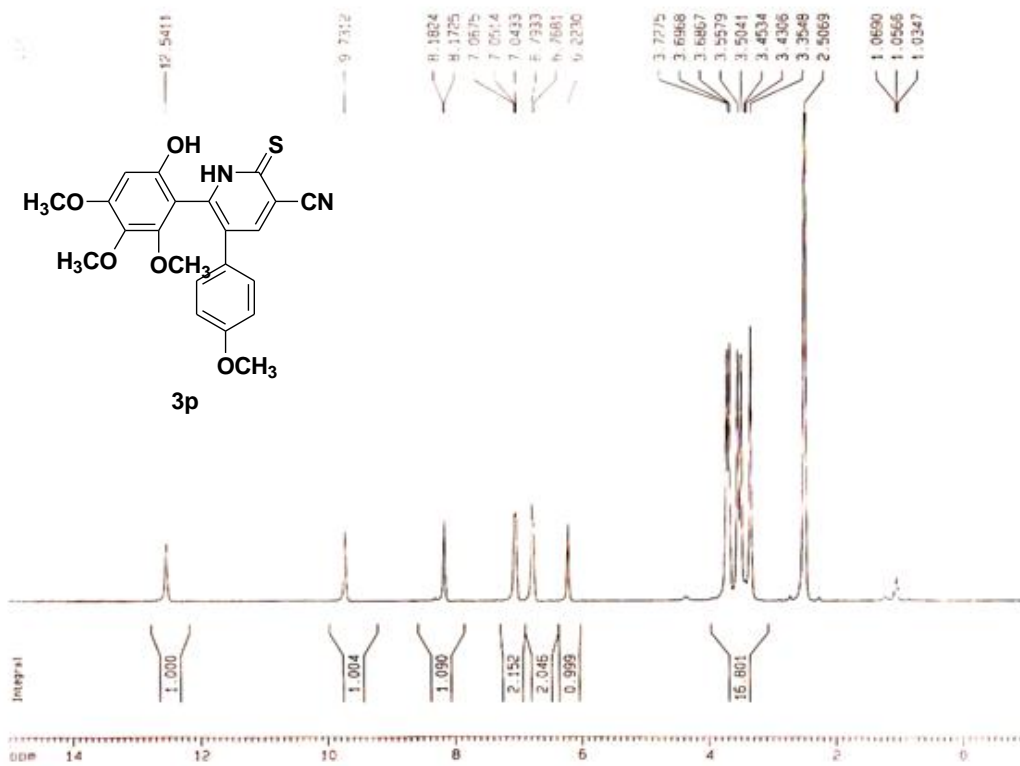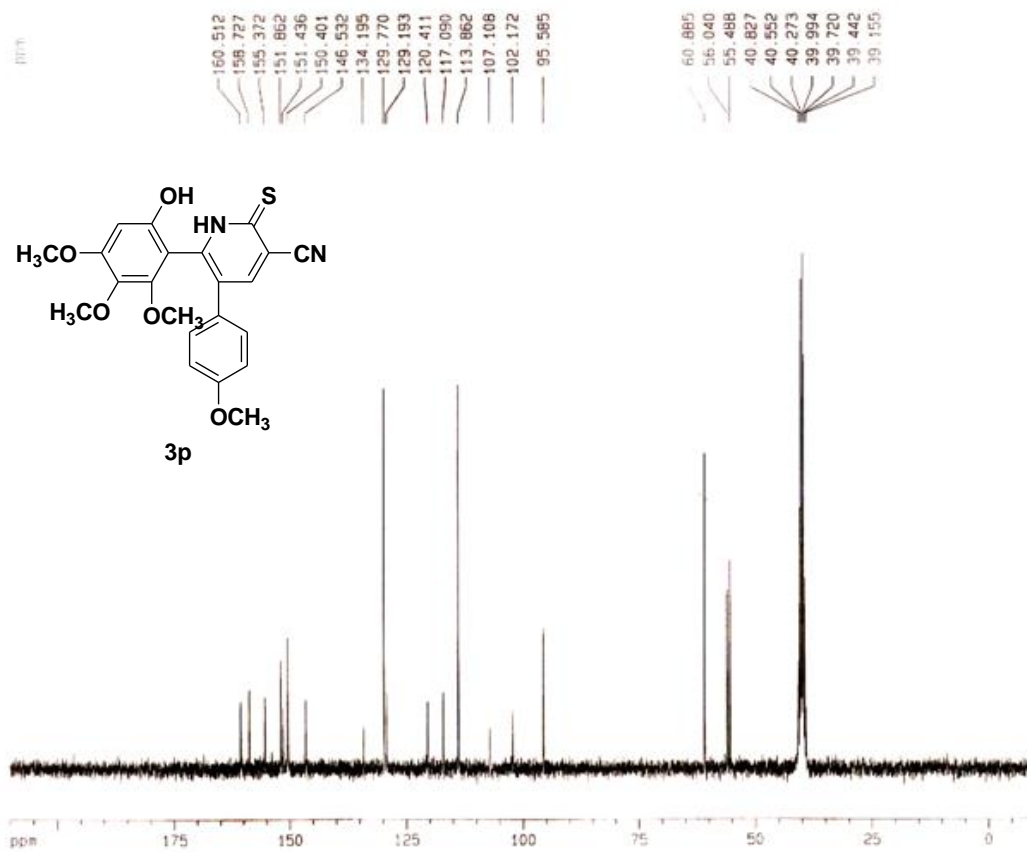

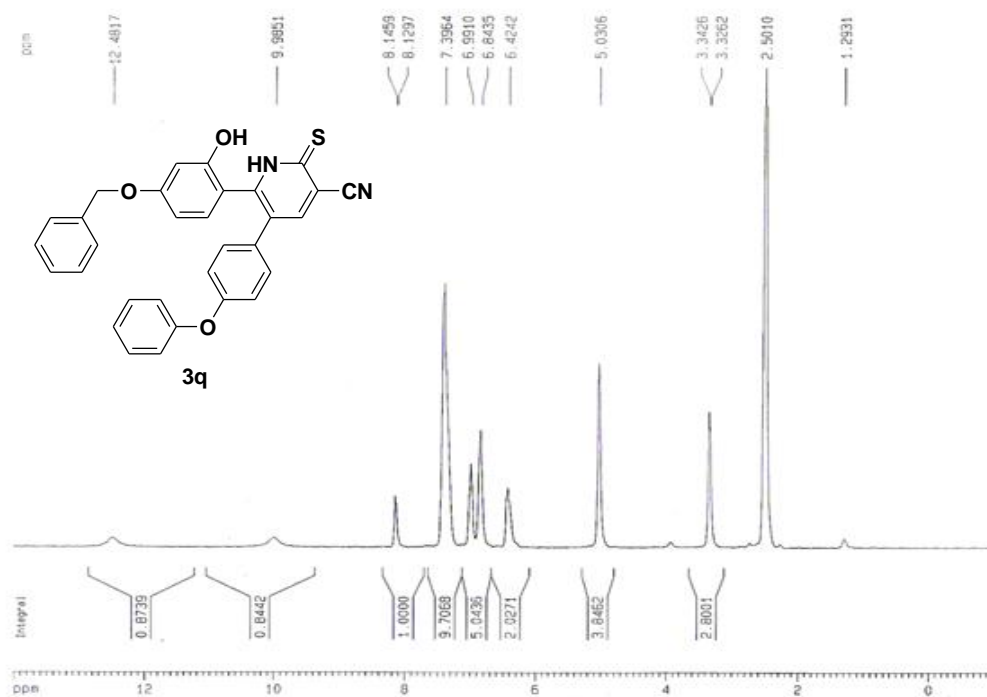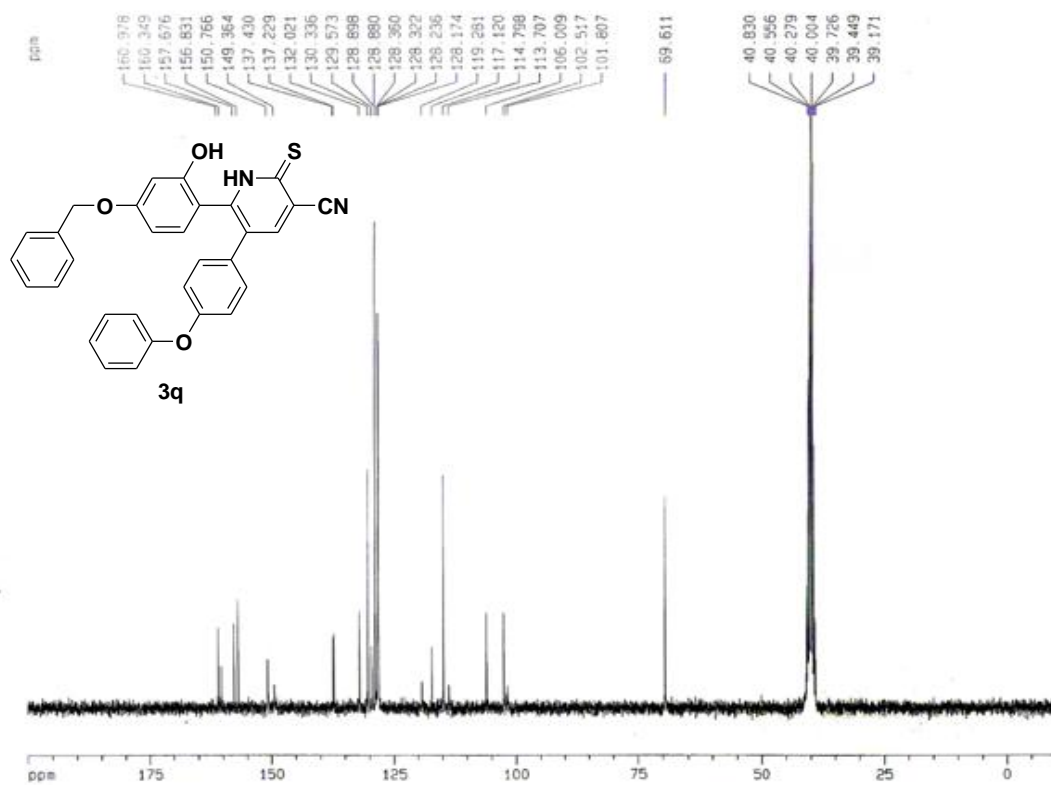

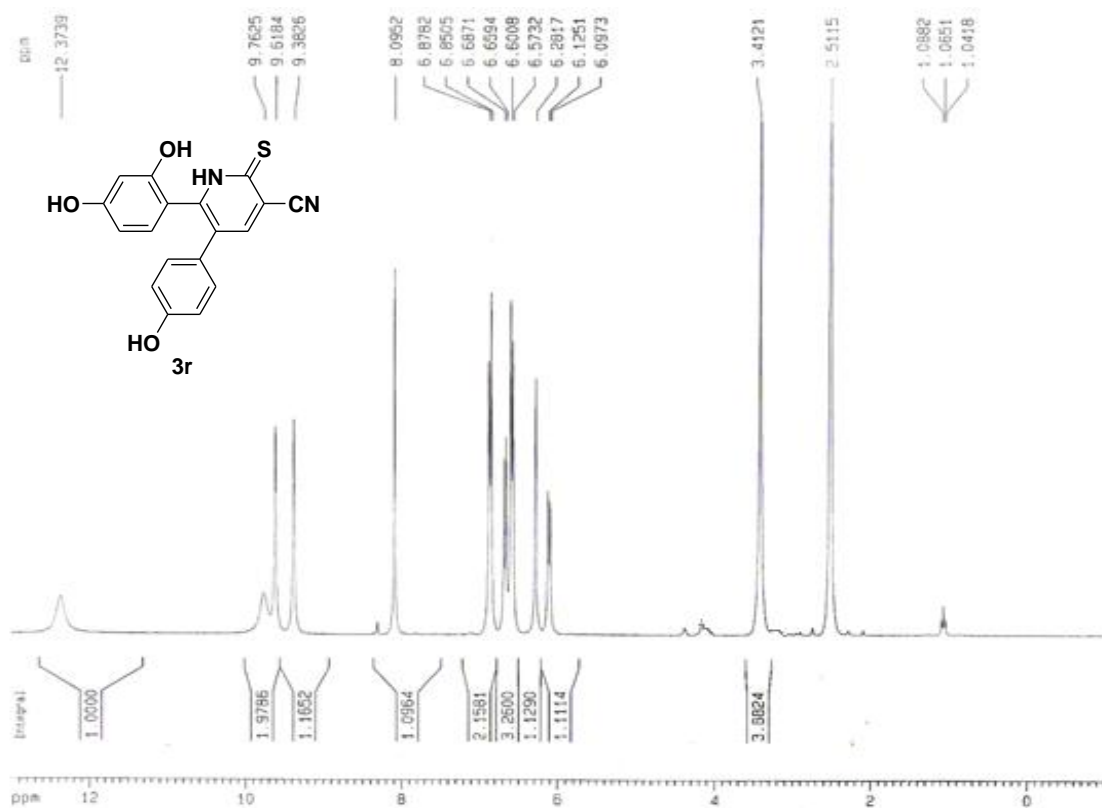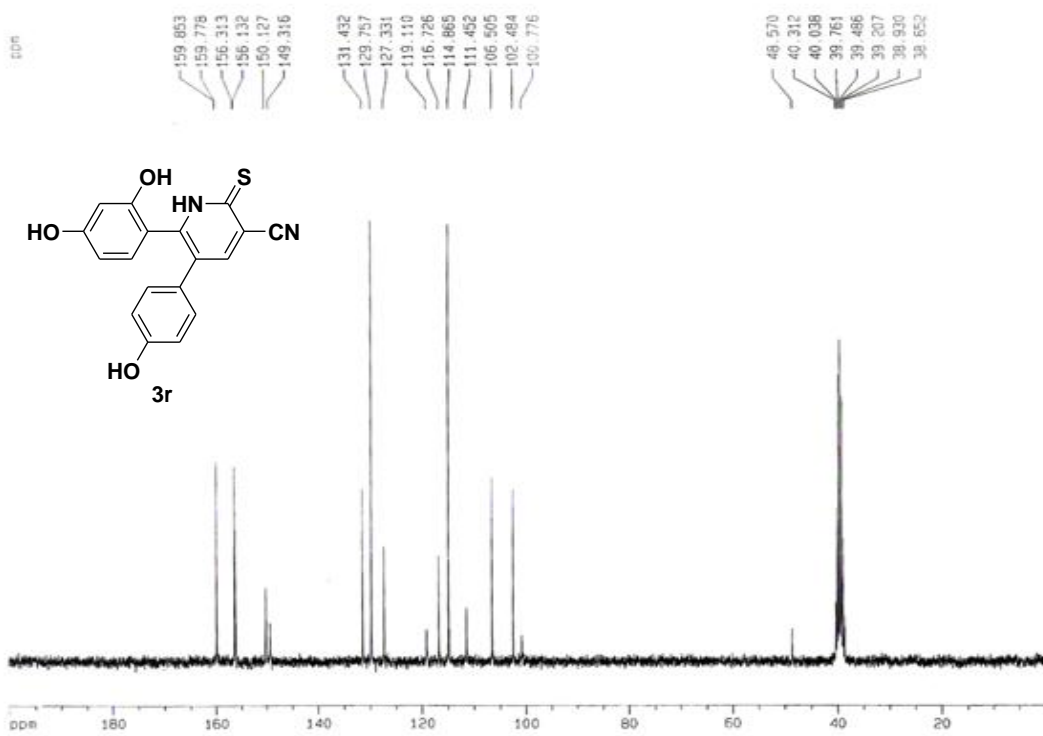

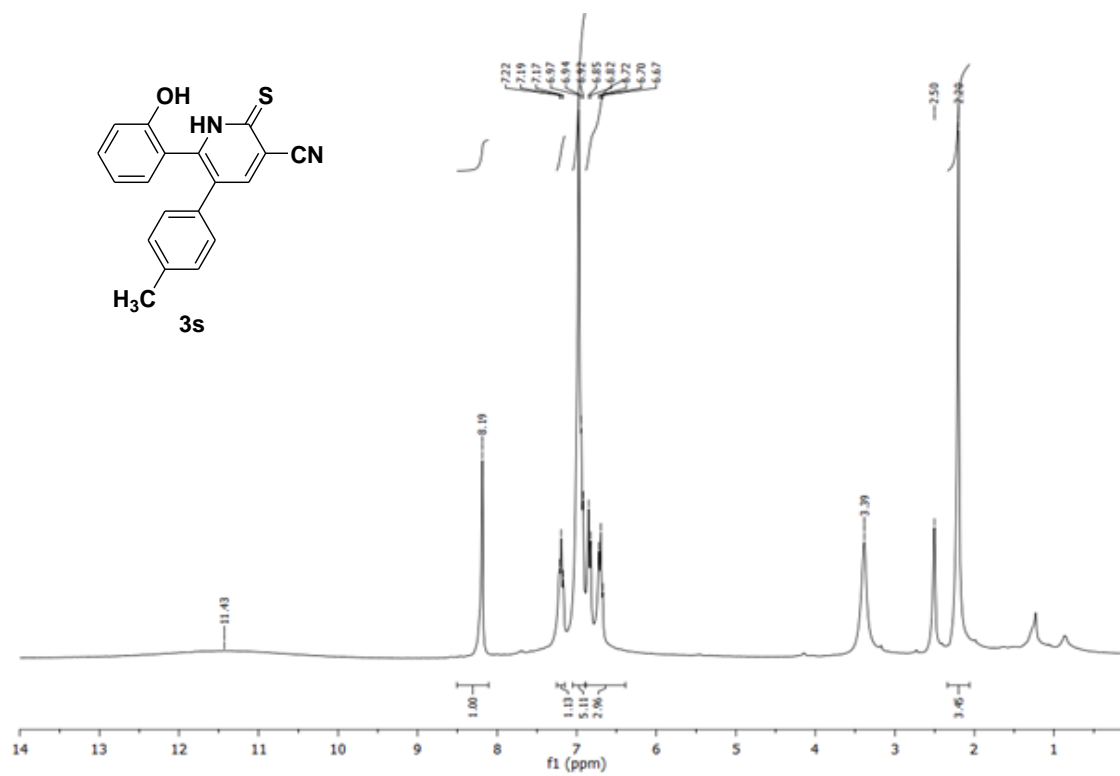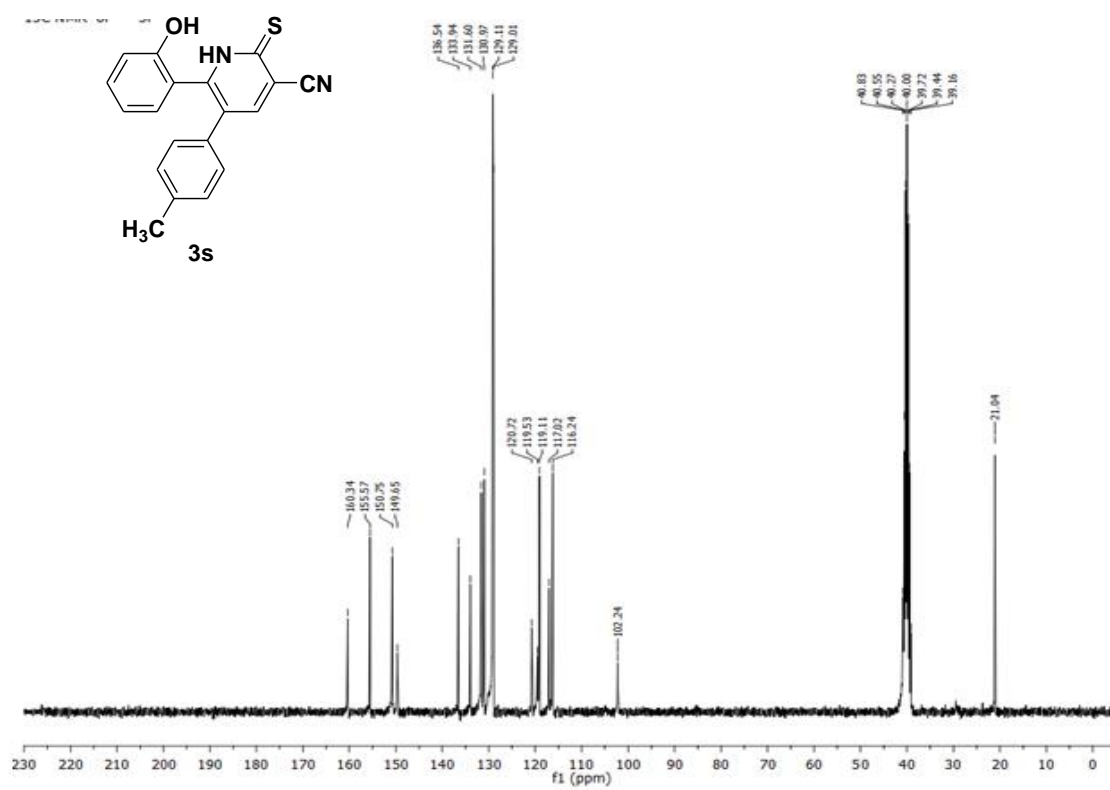



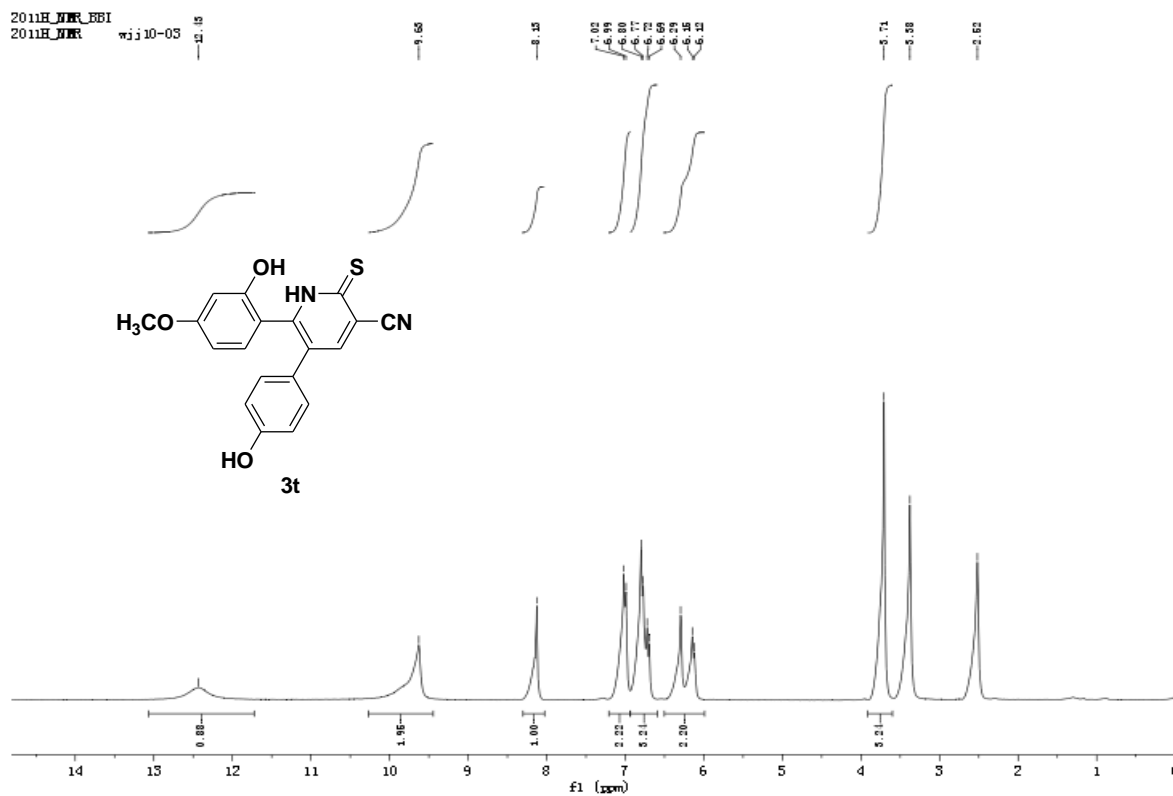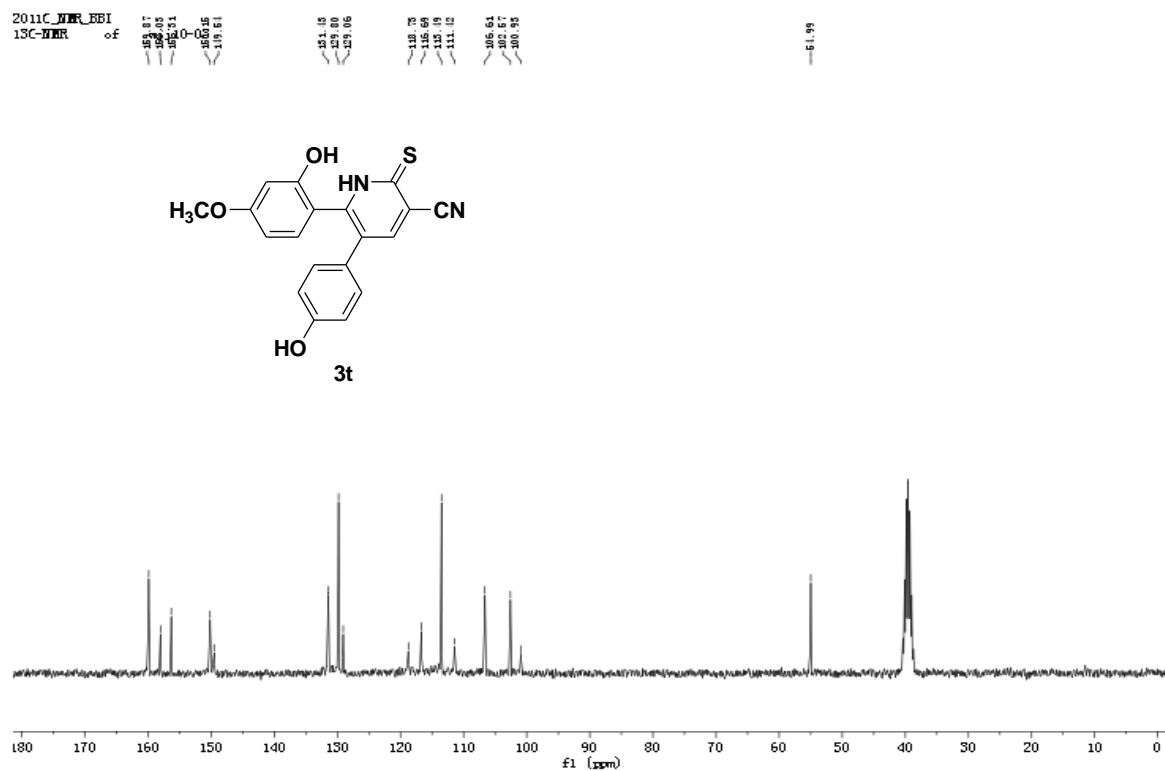

2012H\_BBI  
1H-NMR of wjj06-06

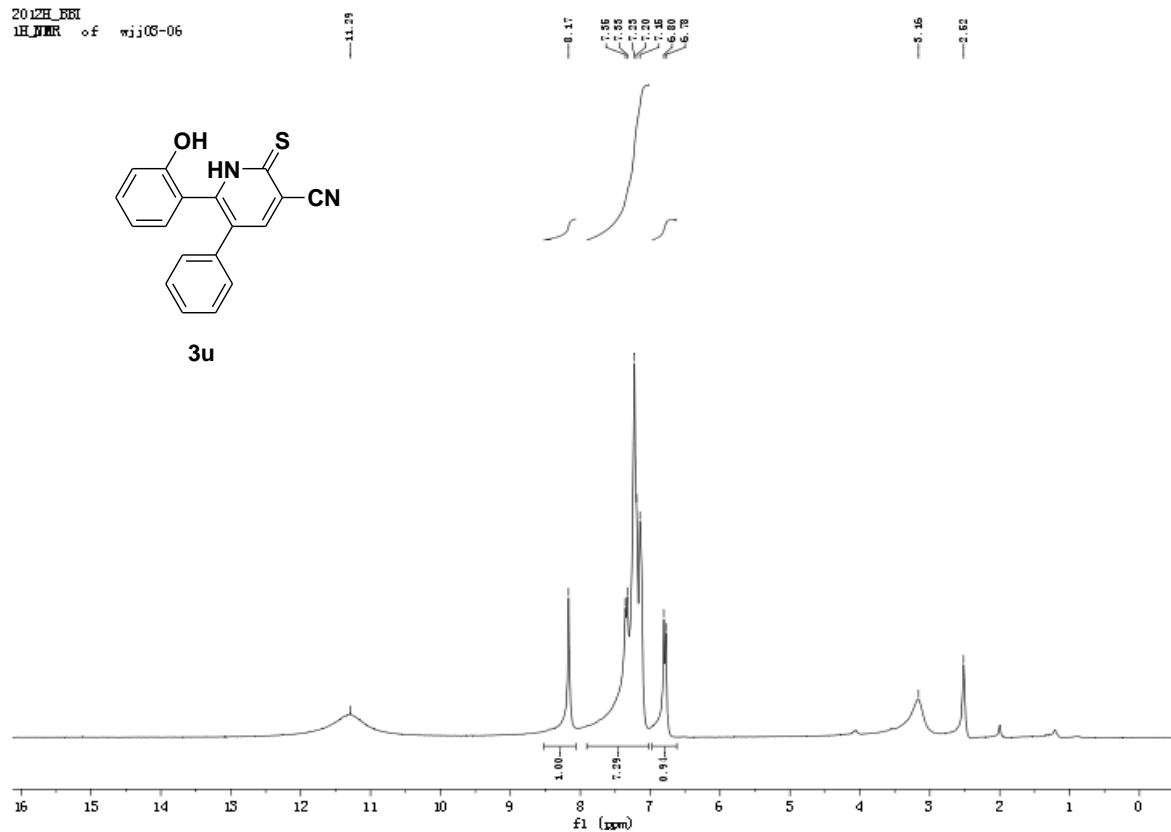

2012C\_BBI  
13C-NMR of wjj22-06

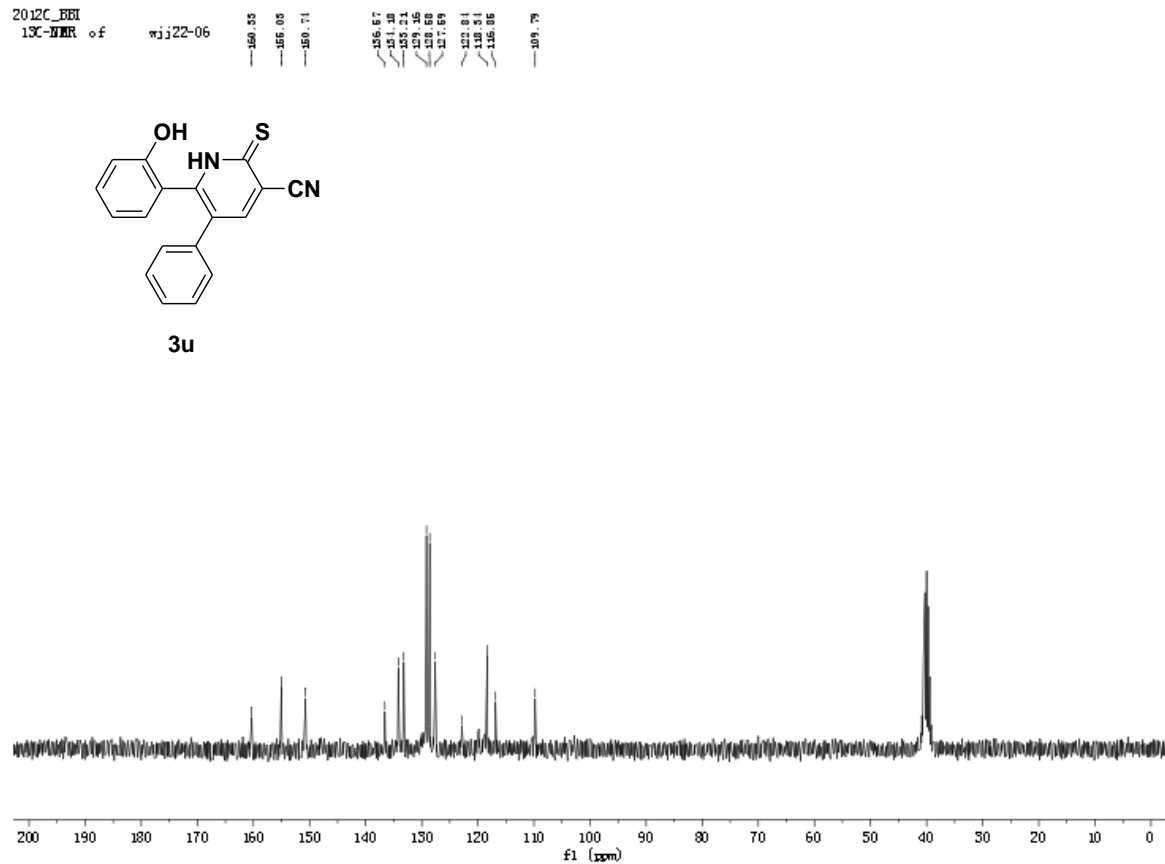

Supplement: c3ob27247h.pdf [file c3ob27247h.pdf]
